# Supplementary material for: The acid-catalysed synthesis of 7-azaindoles from 3-alkynyl-2-aminopyridines and their antimicrobial activity
Source: Royal Society of Chemistry journal article supplement (doi:10.1039/c3ob41798k), 2013-11-07

## NMR Spectra

$^1\text{H}$  NMR

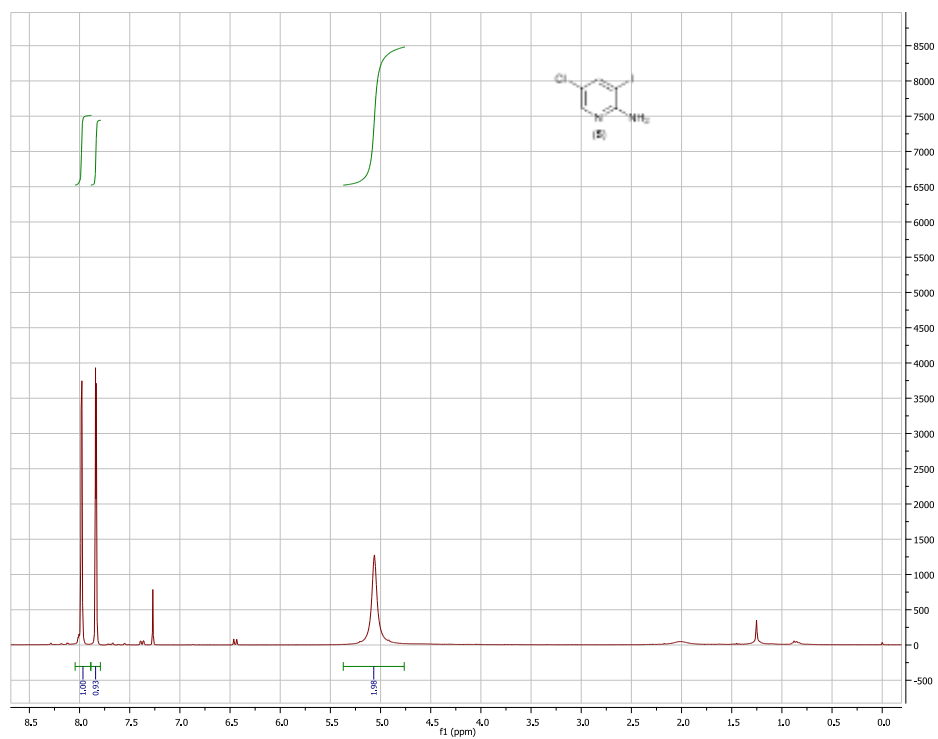

$^1\text{H}$  NMR

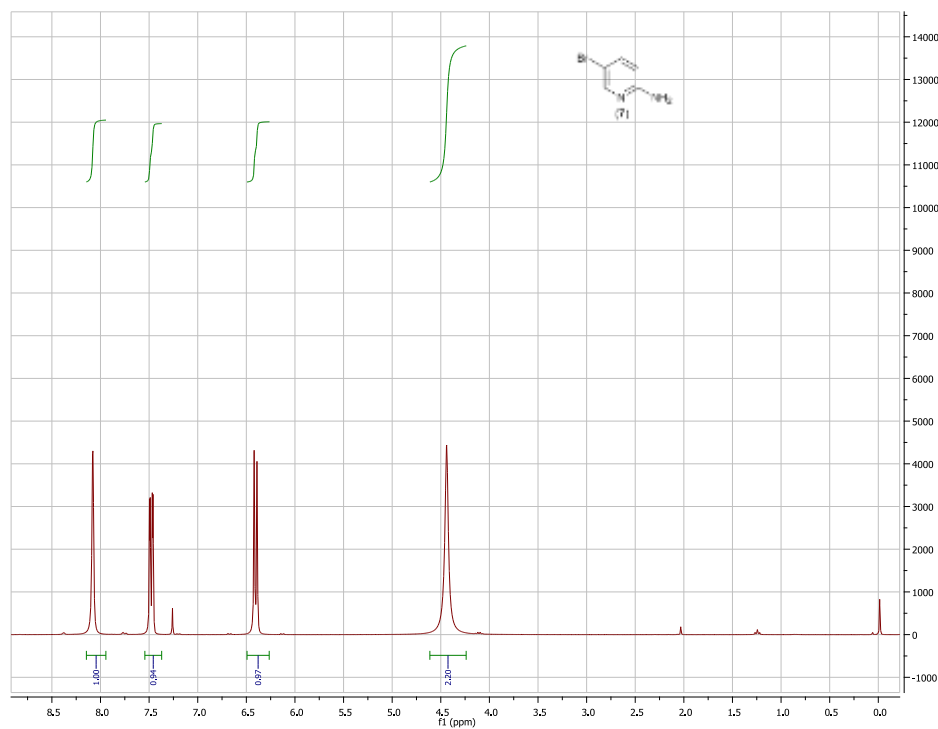

# $^1\text{H}$ NMR

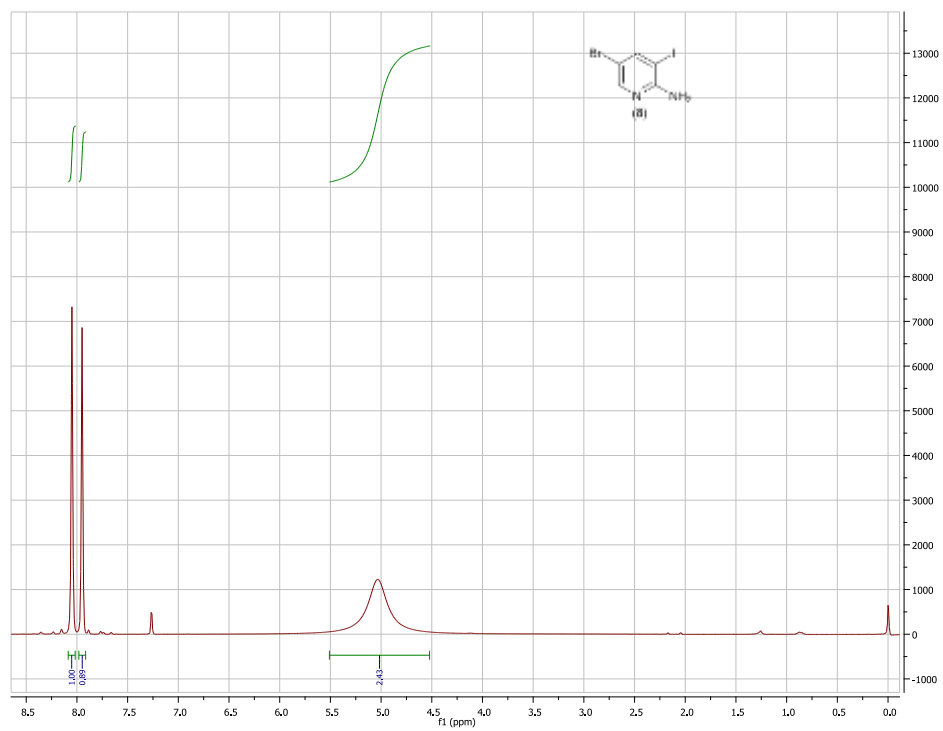

### <sup>1</sup>H NMR

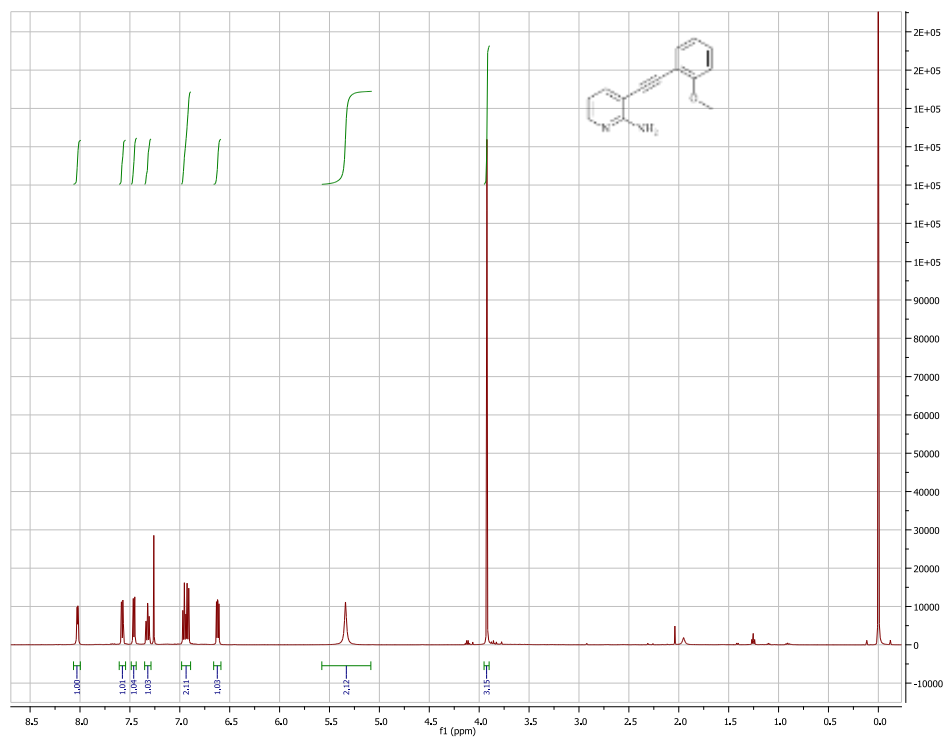

### <sup>13</sup>C NMR

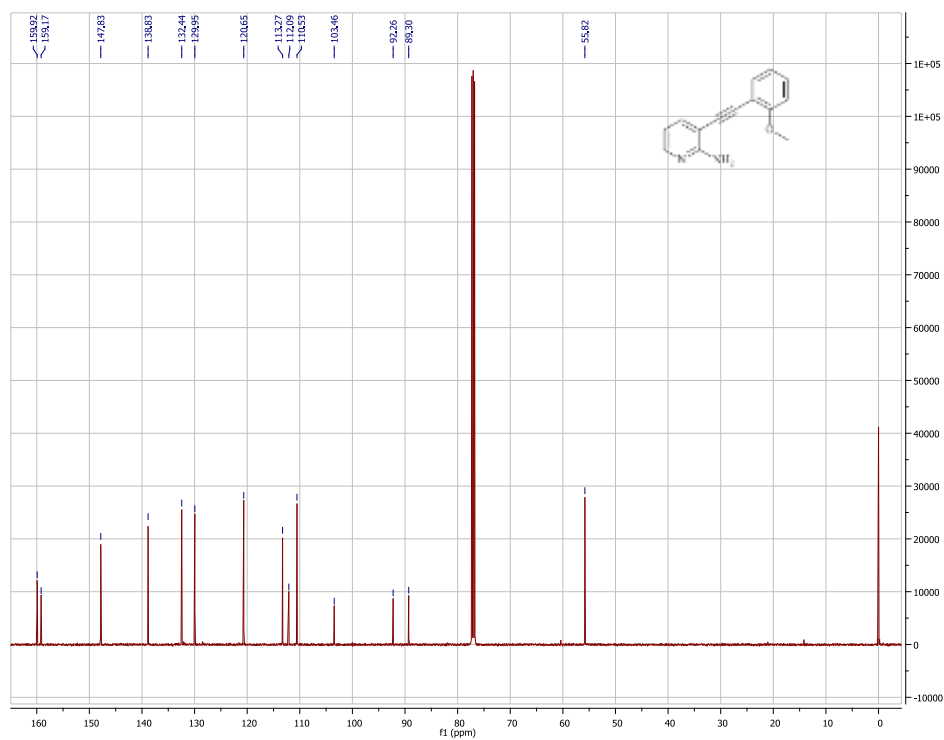

### <sup>1</sup>H NMR

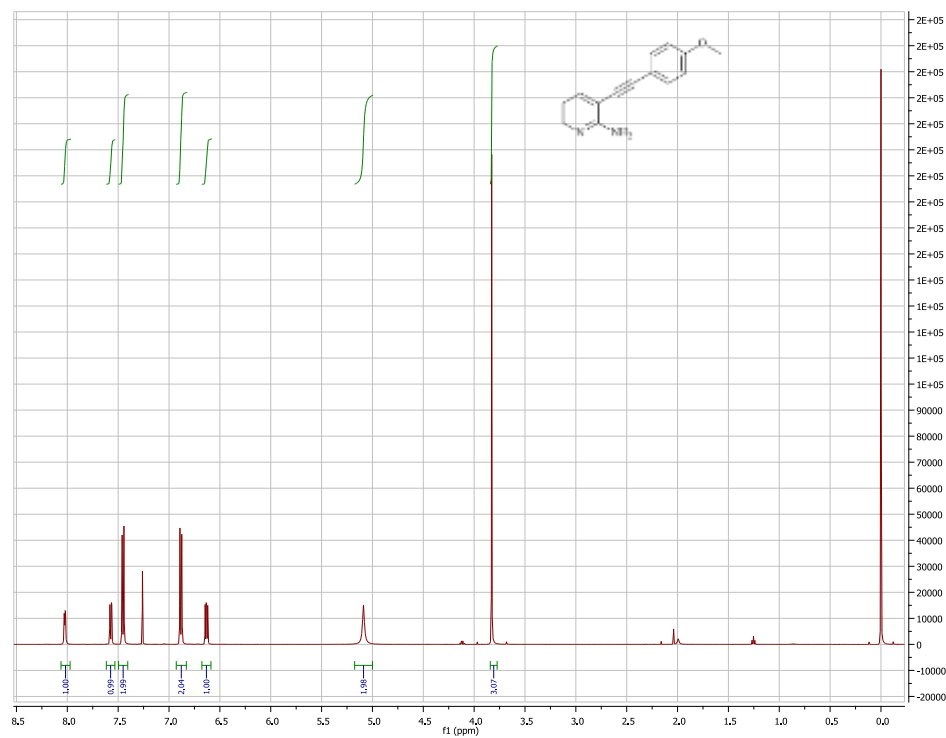

### <sup>13</sup>C NMR

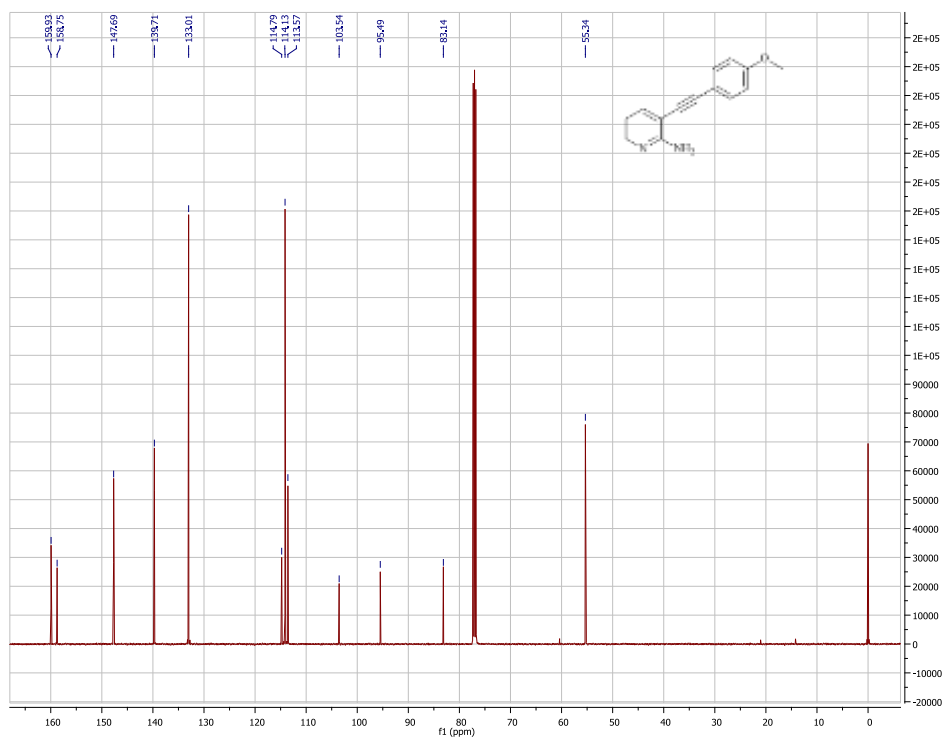

### $^1\text{H}$ NMR

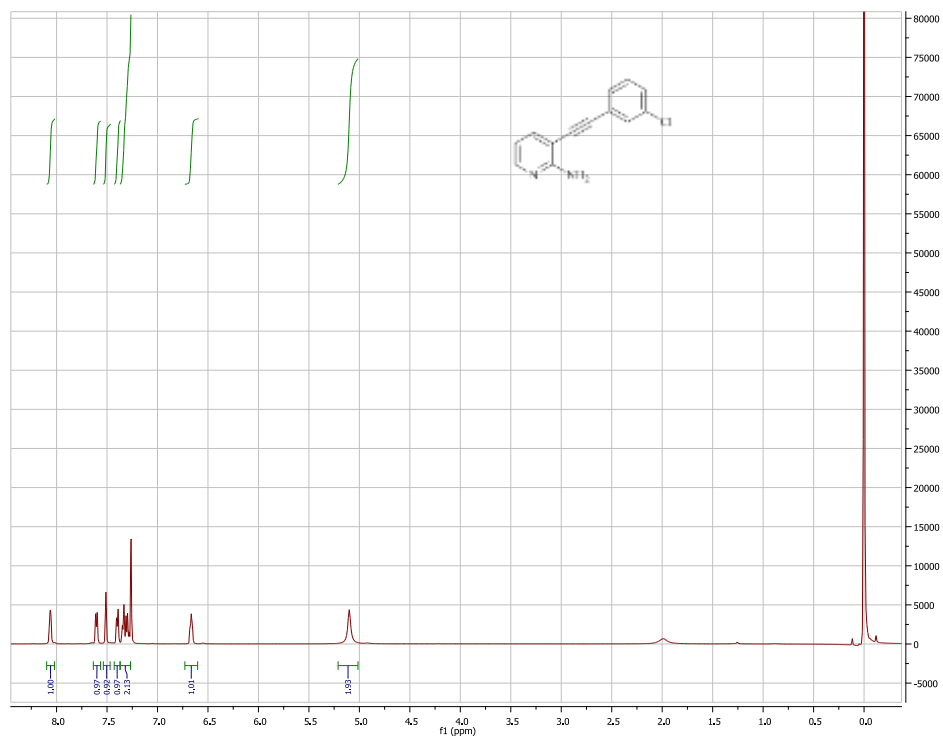

### $^{13}\text{C}$ NMR

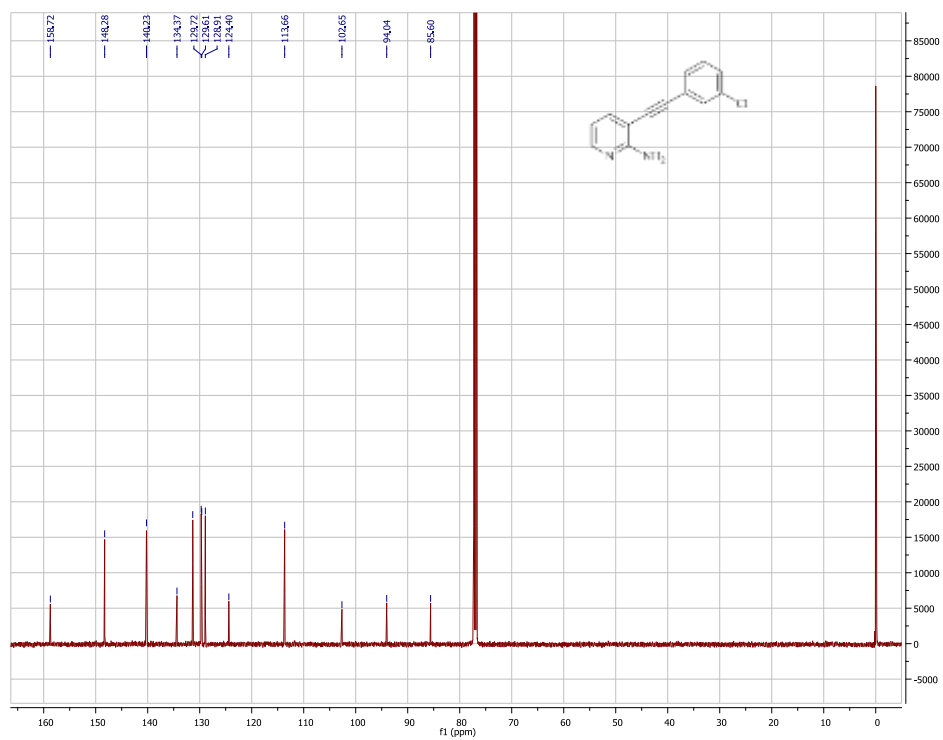

### <sup>1</sup>H NMR

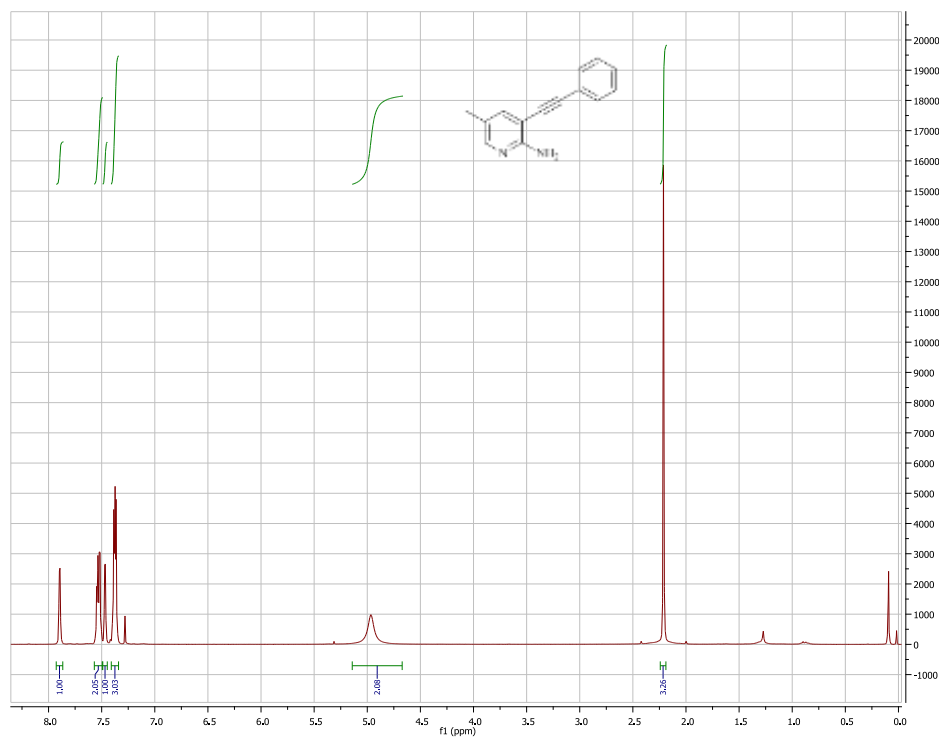

### <sup>13</sup>C NMR

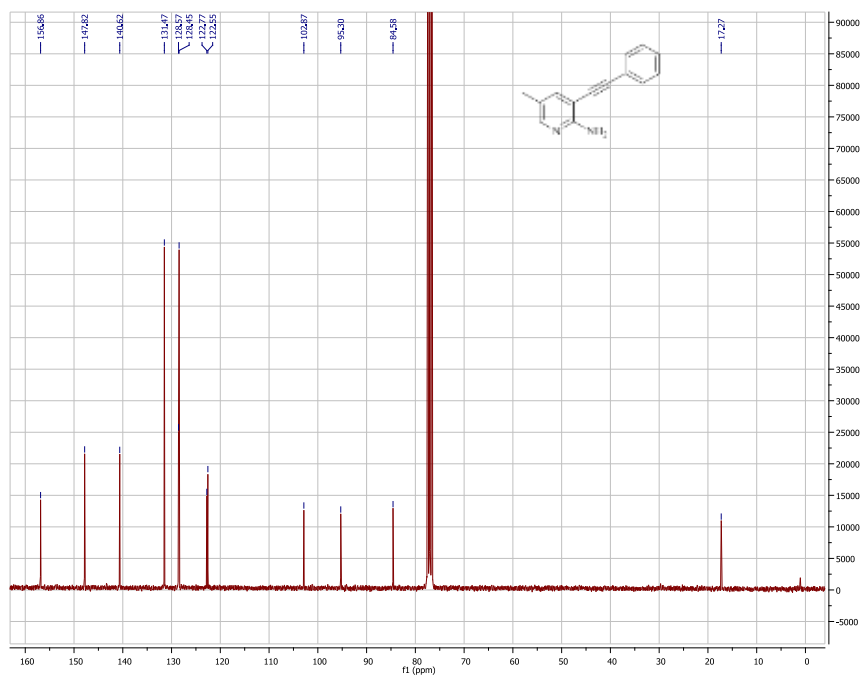

### <sup>1</sup>H NMR

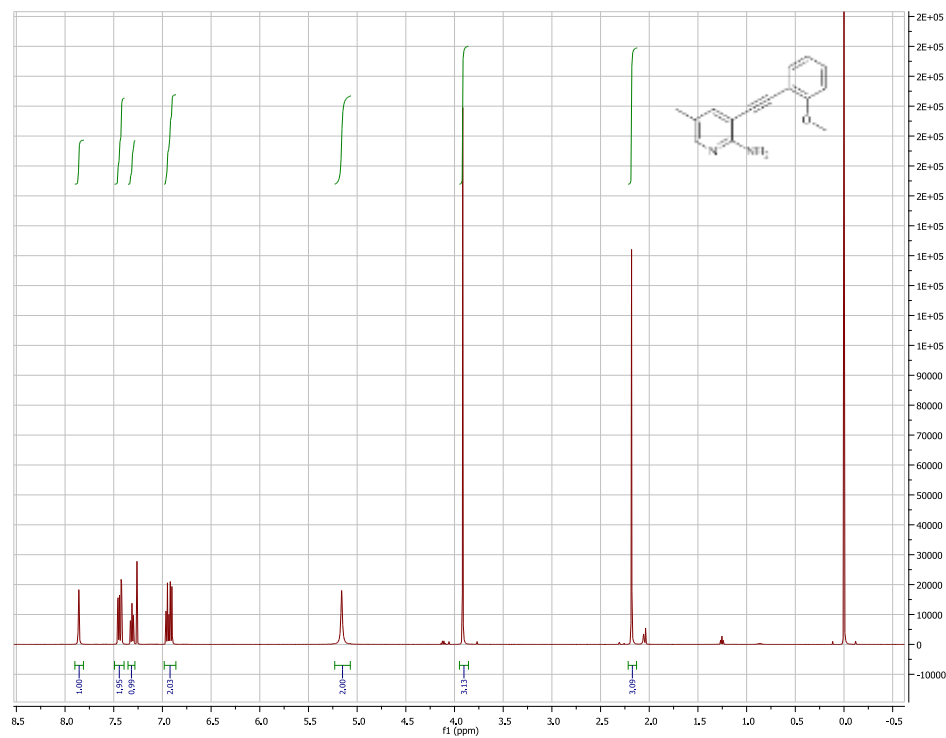

### <sup>13</sup>C NMR

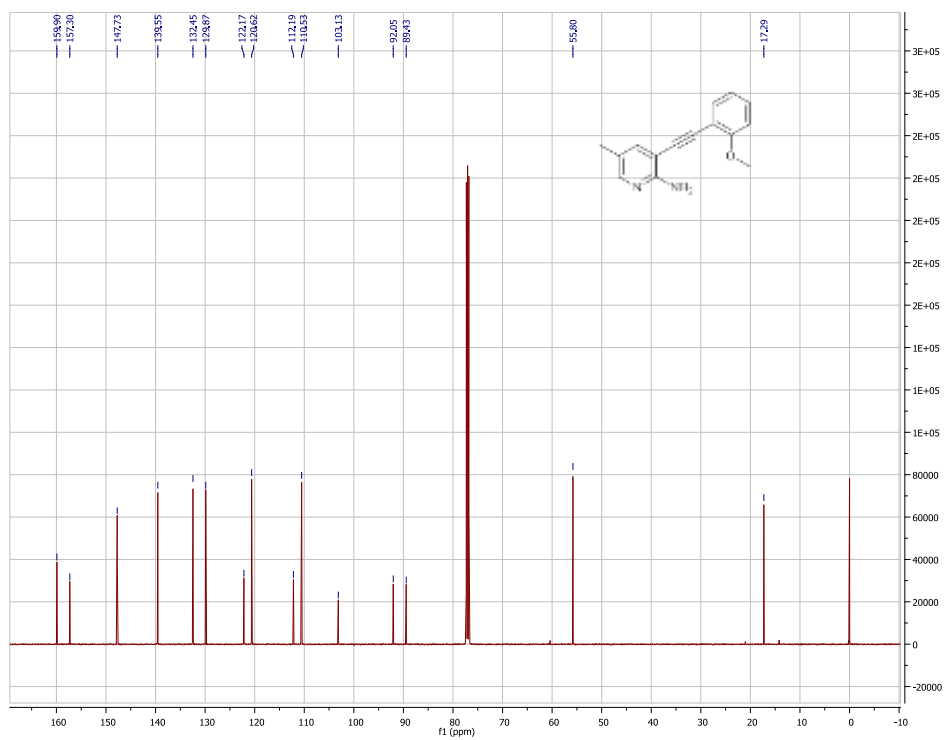

### <sup>1</sup>H NMR

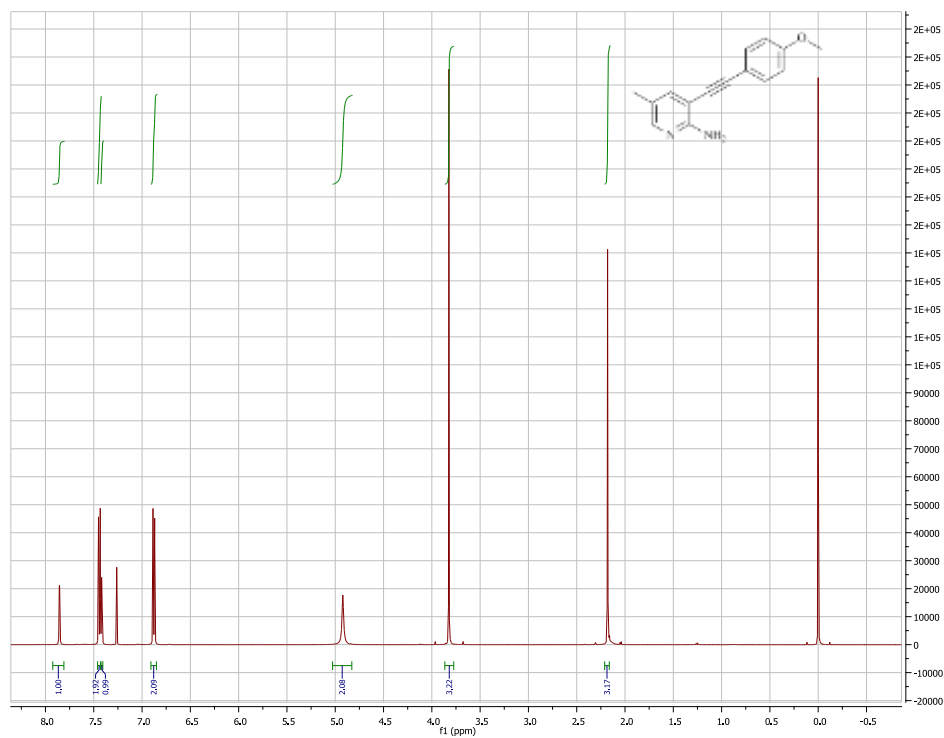

### <sup>13</sup>C NMR

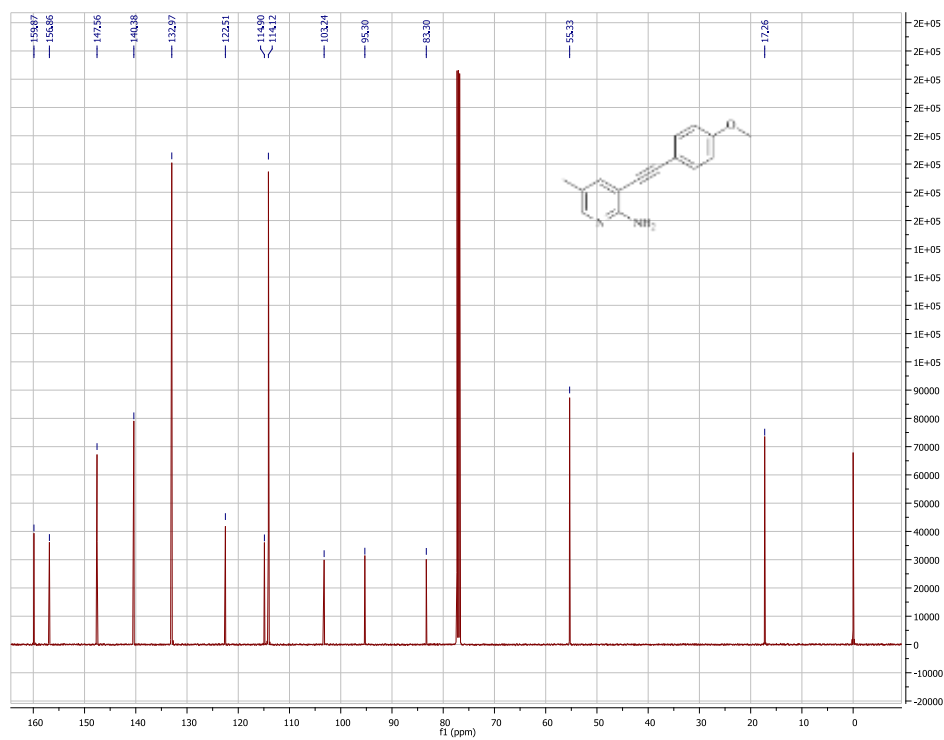



### $^1\text{H}$ NMR

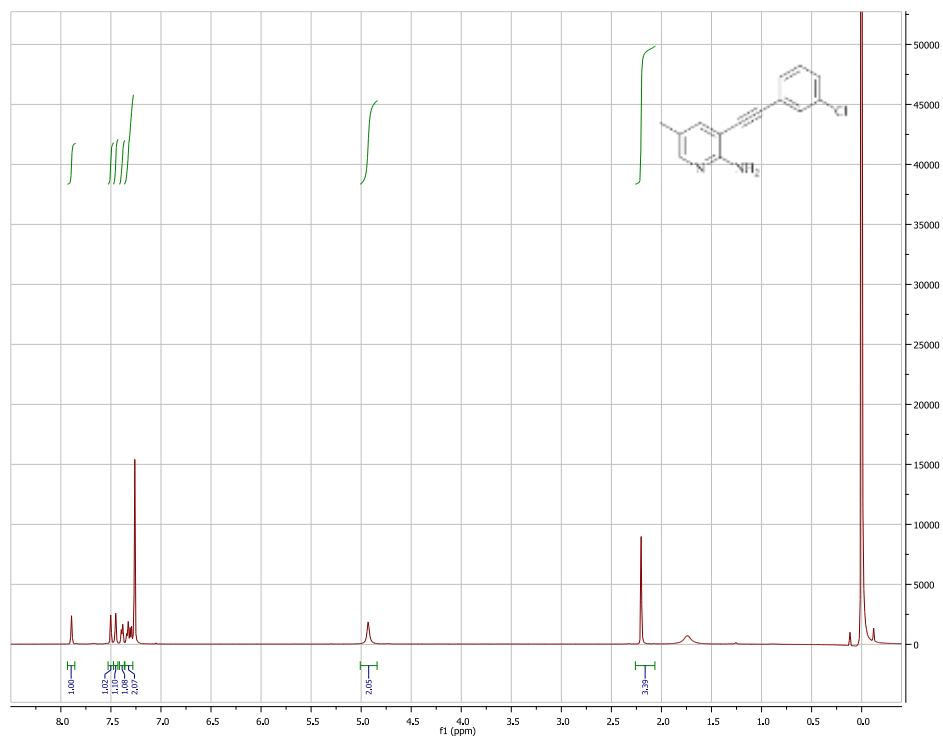

### $^{13}\text{C}$ NMR

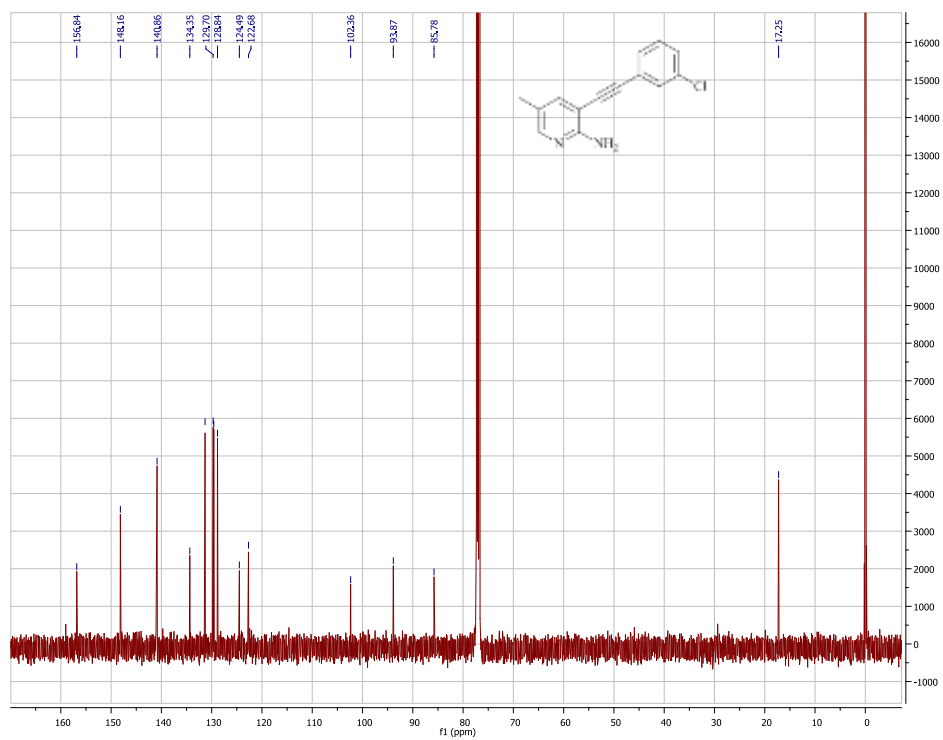

$^1\text{H}$  NMR

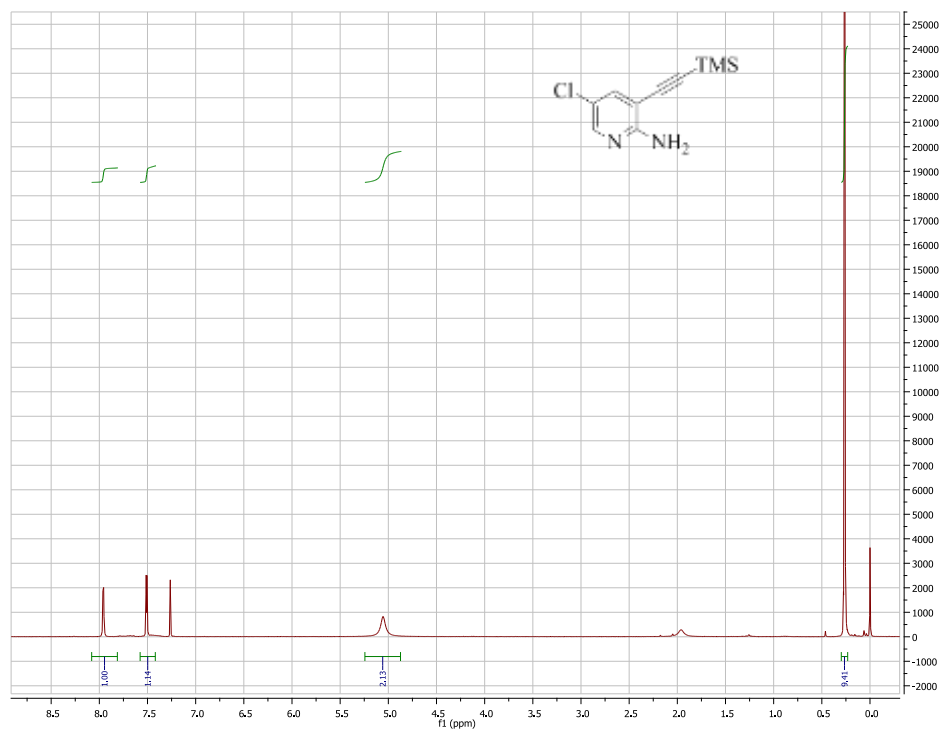

### $^1\text{H}$ NMR

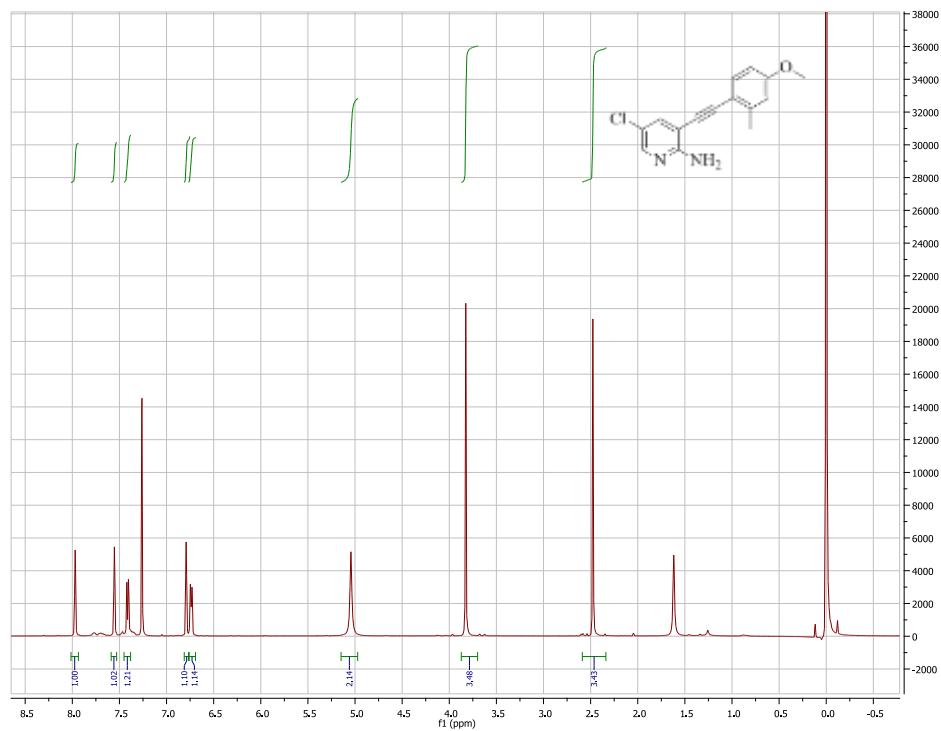

### $^{13}\text{C}$ NMR

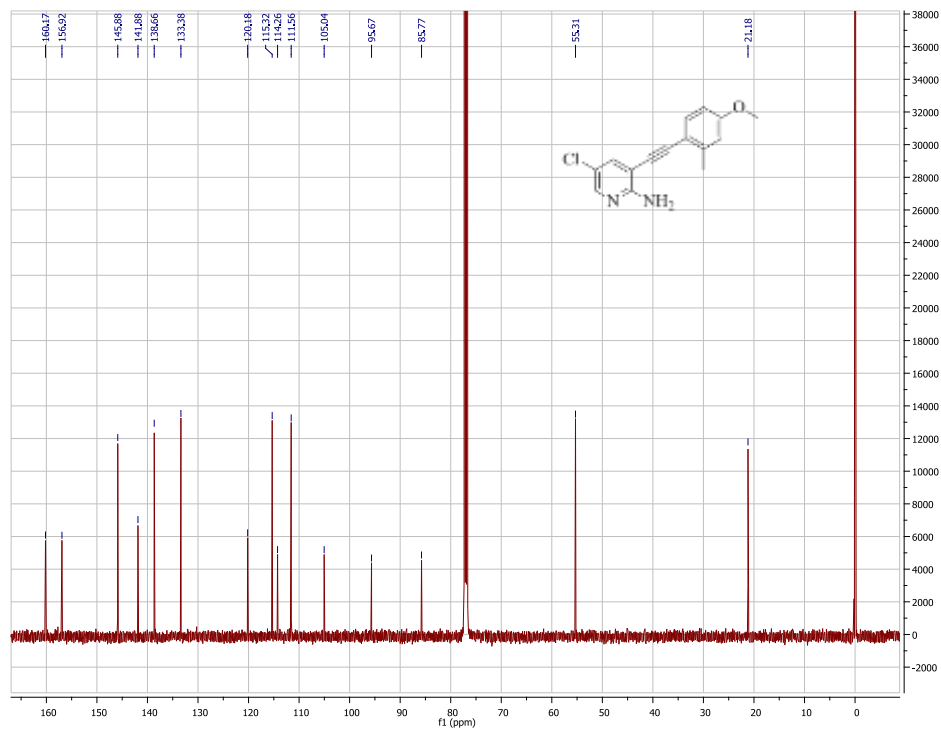

### <sup>1</sup>H NMR

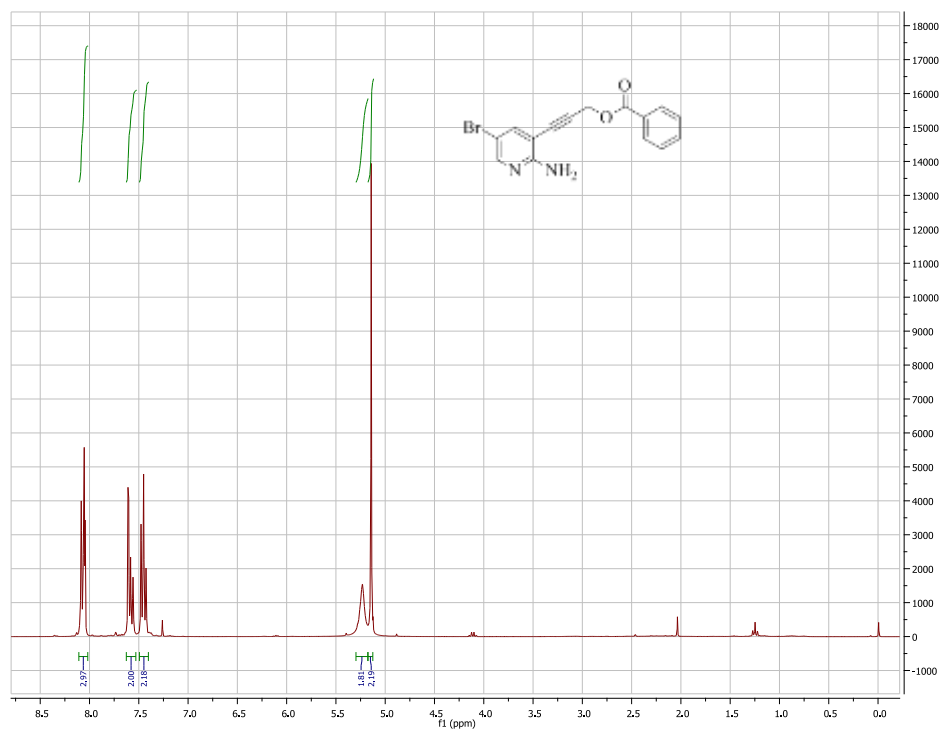

### <sup>13</sup>C NMR

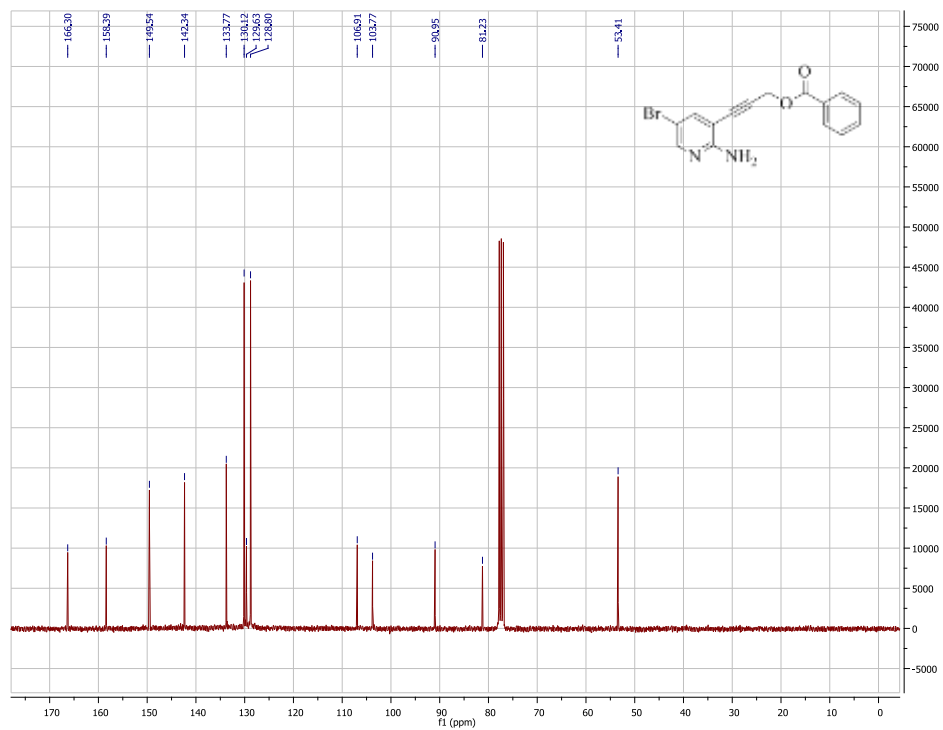

### <sup>1</sup>H NMR

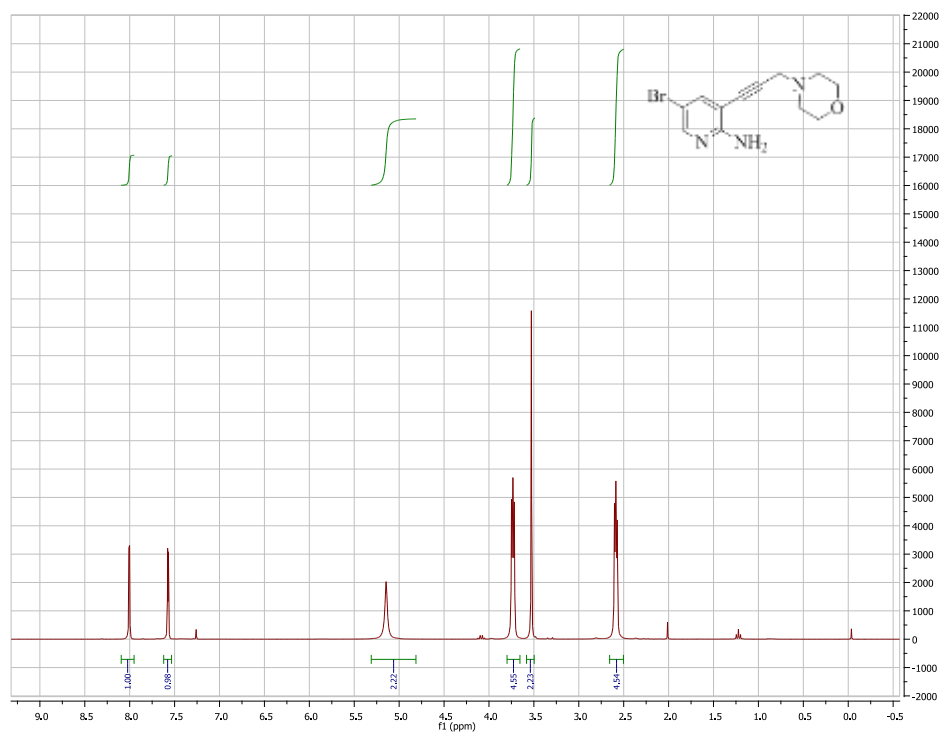

### <sup>13</sup>C NMR

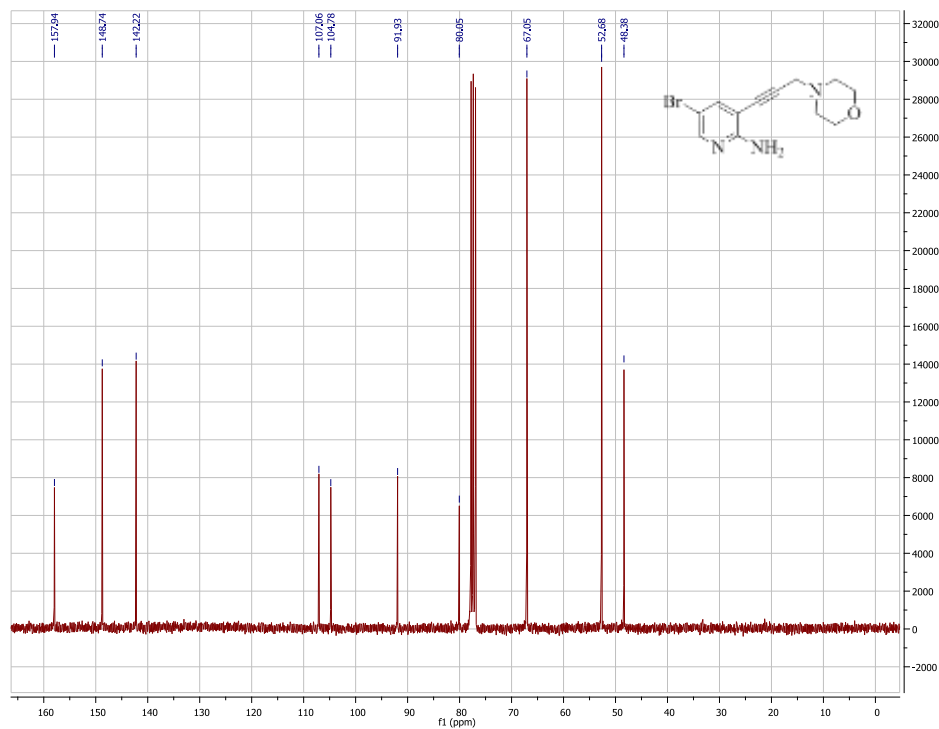

### <sup>1</sup>H NMR

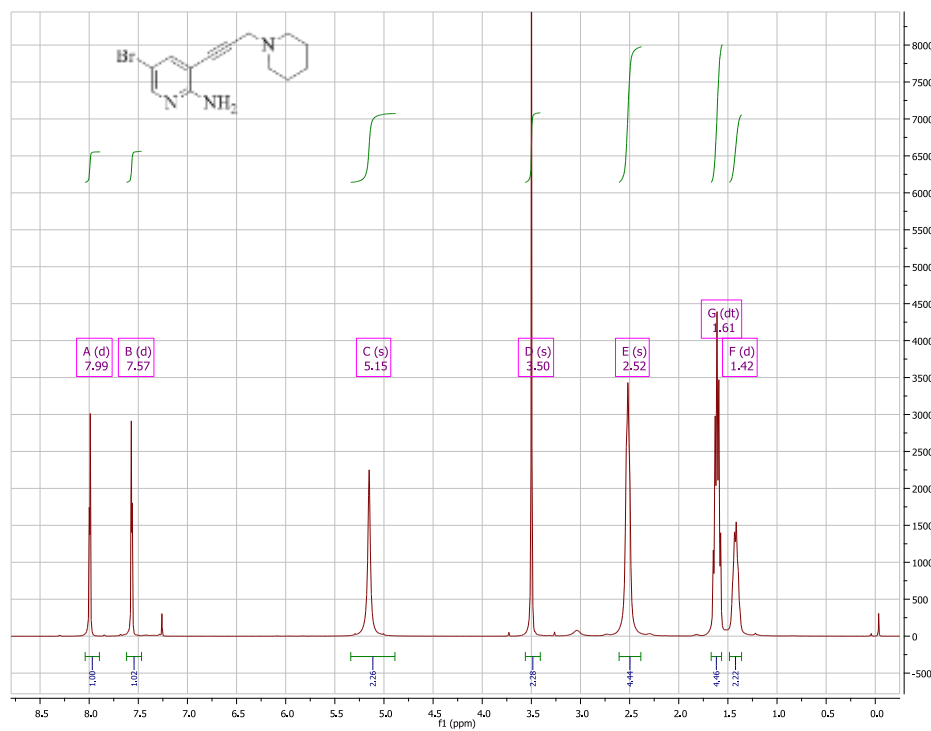

### <sup>13</sup>C NMR

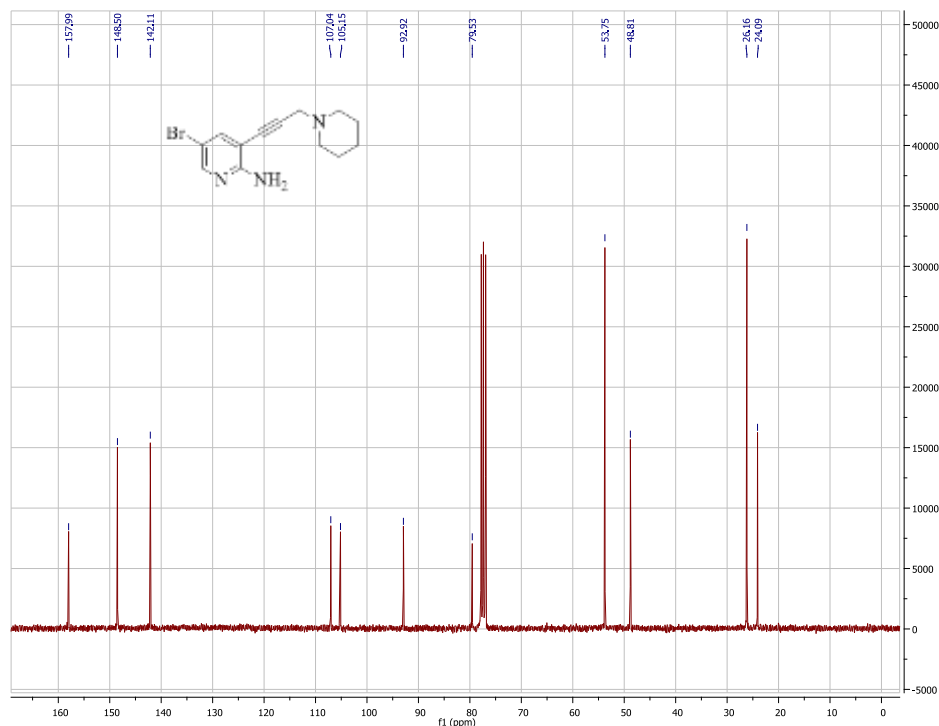

### <sup>1</sup>H NMR

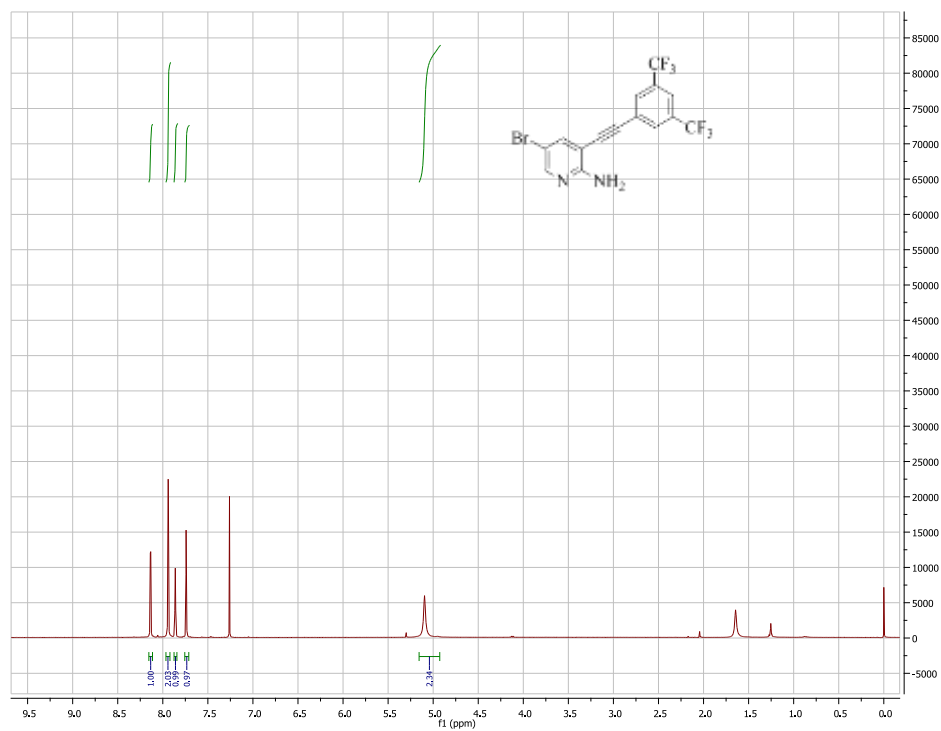

### <sup>13</sup>C NMR

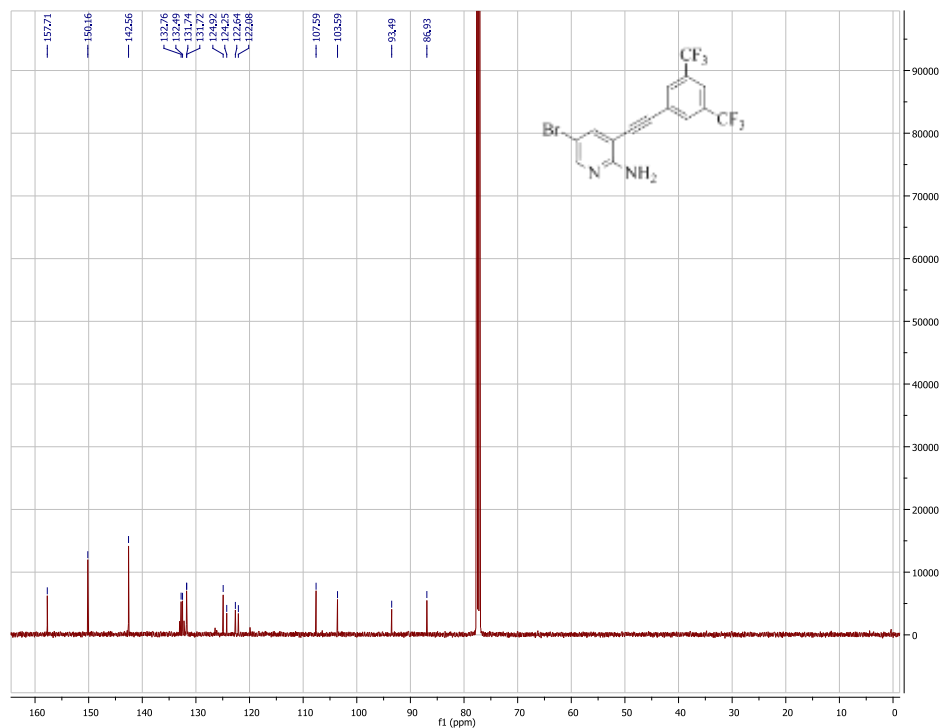

### $^1\text{H}$ NMR

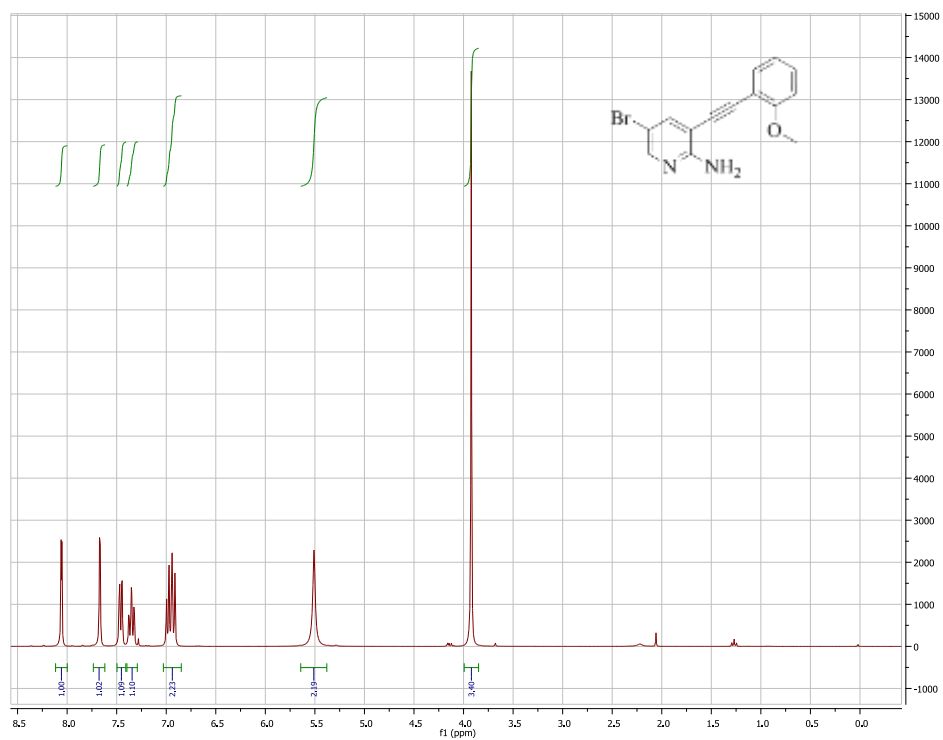

### $^{13}\text{C}$ NMR

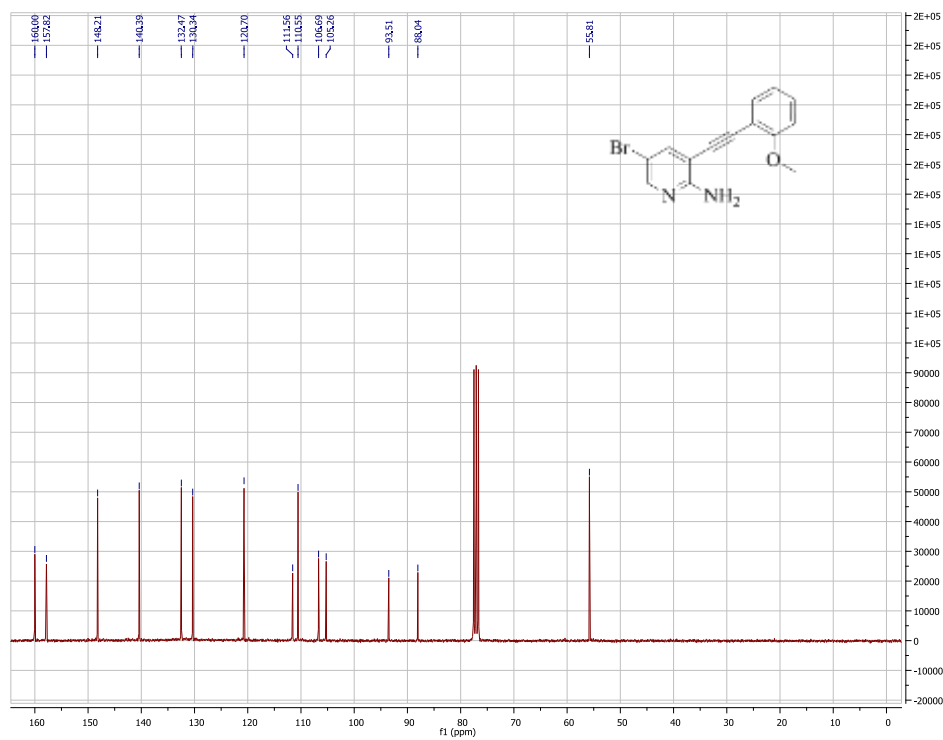



### $^1\text{H}$ NMR

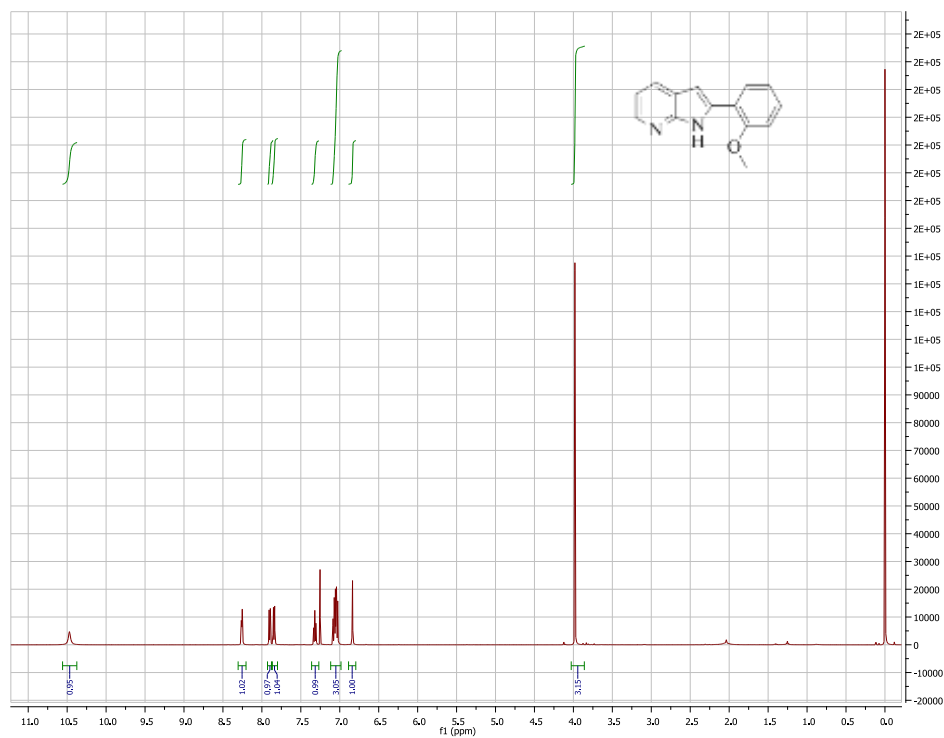

### $^{13}\text{C}$ NMR

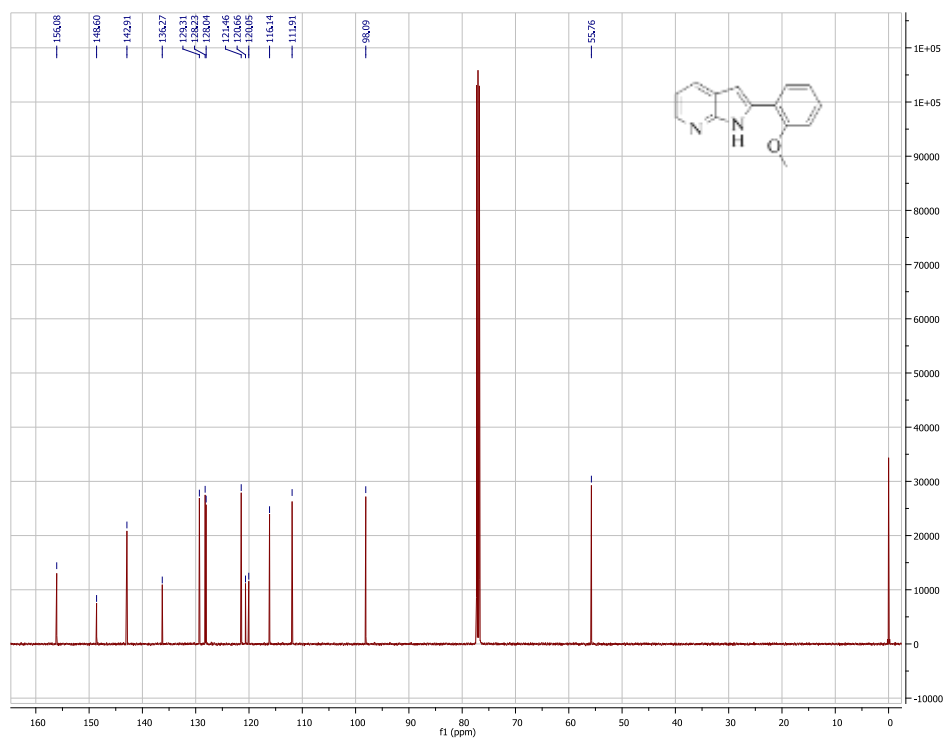

### <sup>1</sup>H NMR

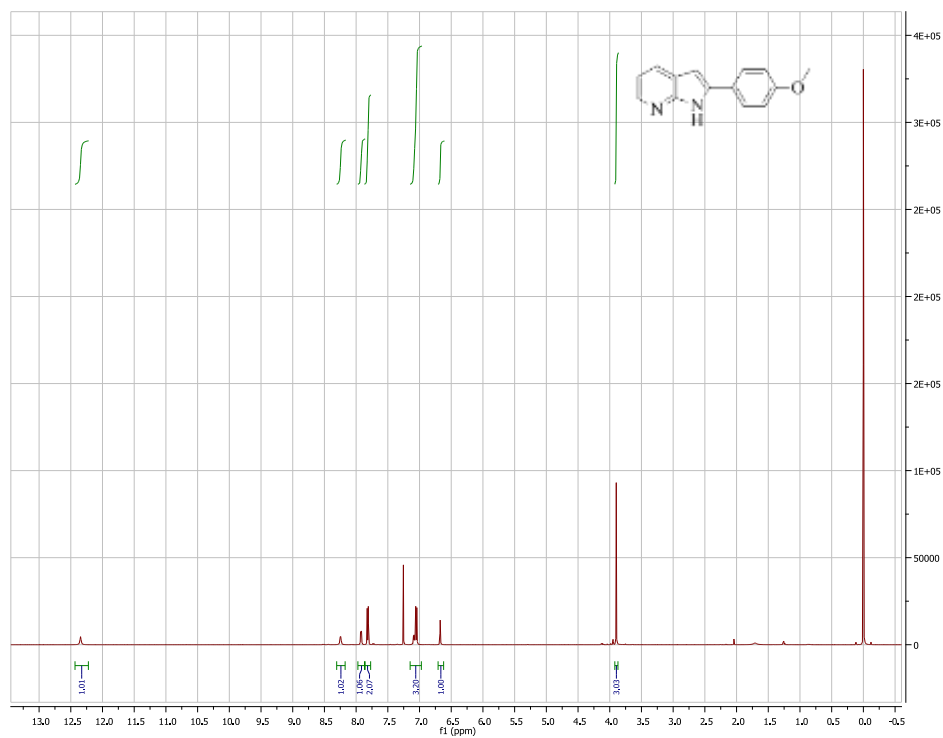

### <sup>13</sup>C NMR

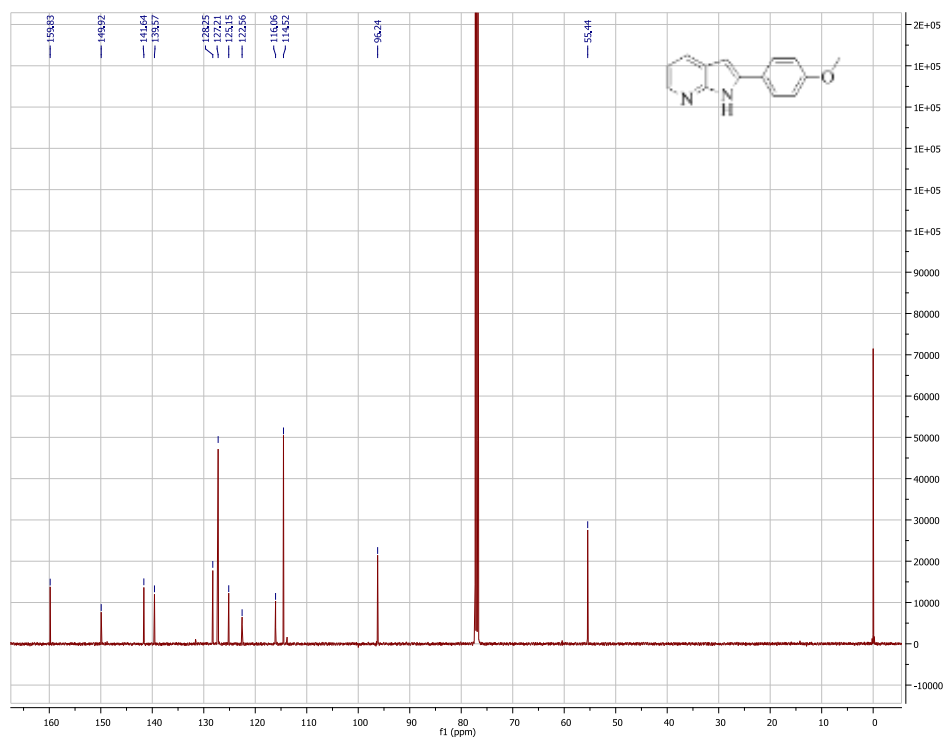

### $^1\text{H}$ NMR

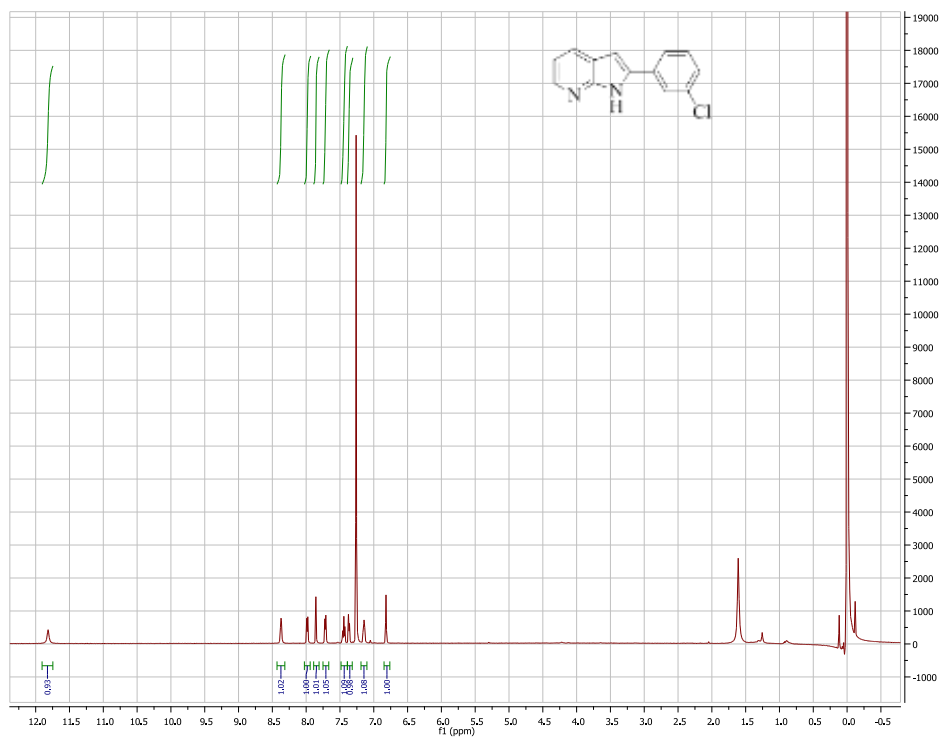

### $^{13}\text{C}$ NMR

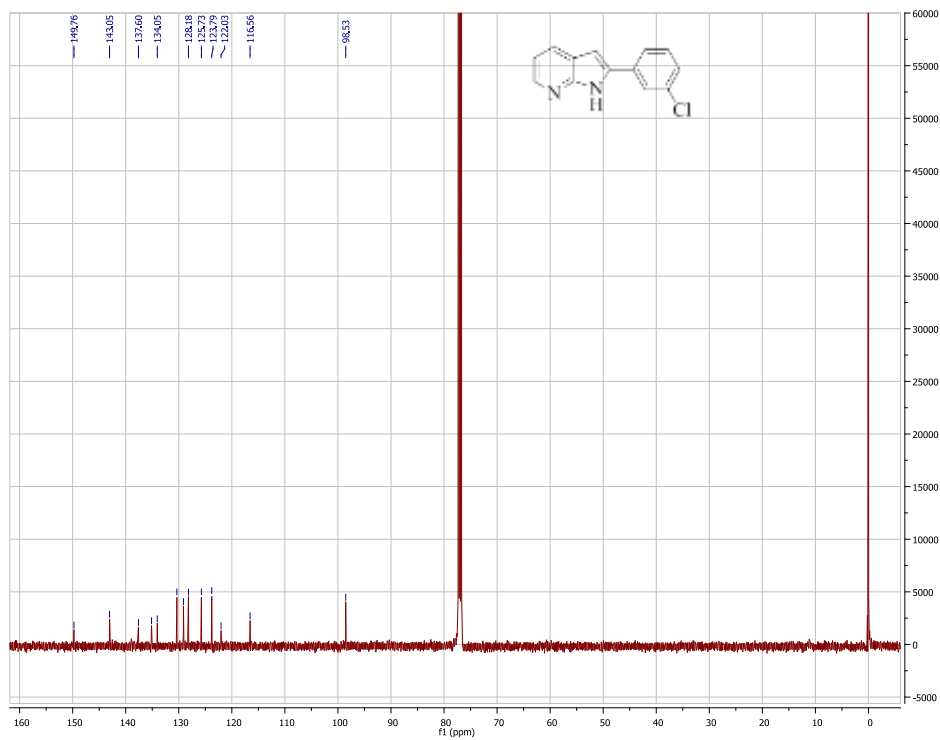

### $^1\text{H}$ NMR

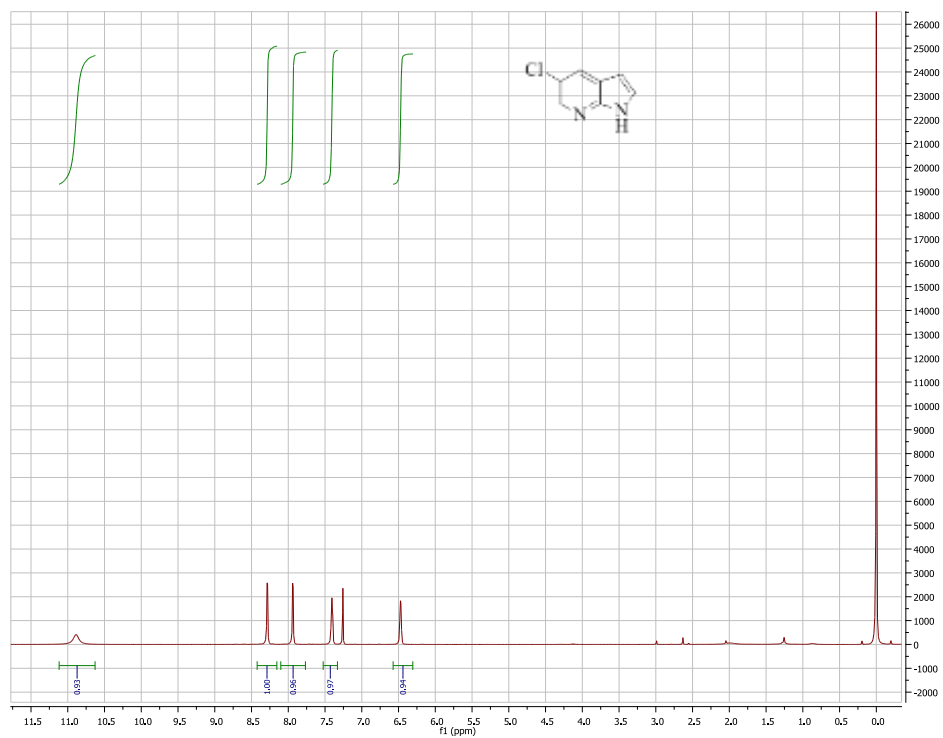

### $^{13}\text{C}$ NMR

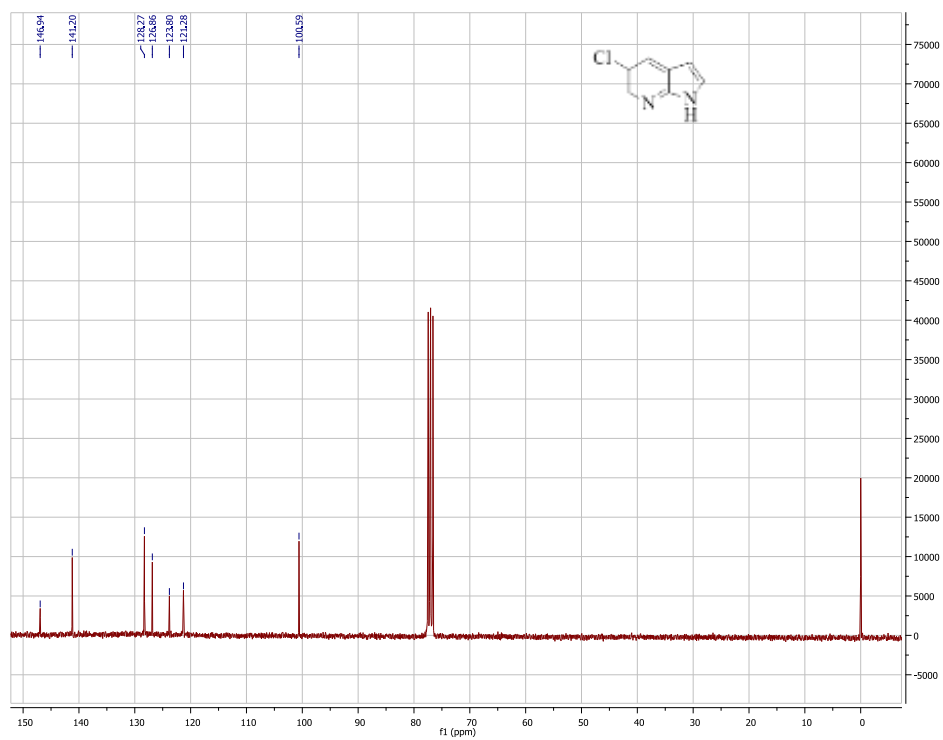

### $^1\text{H}$ NMR

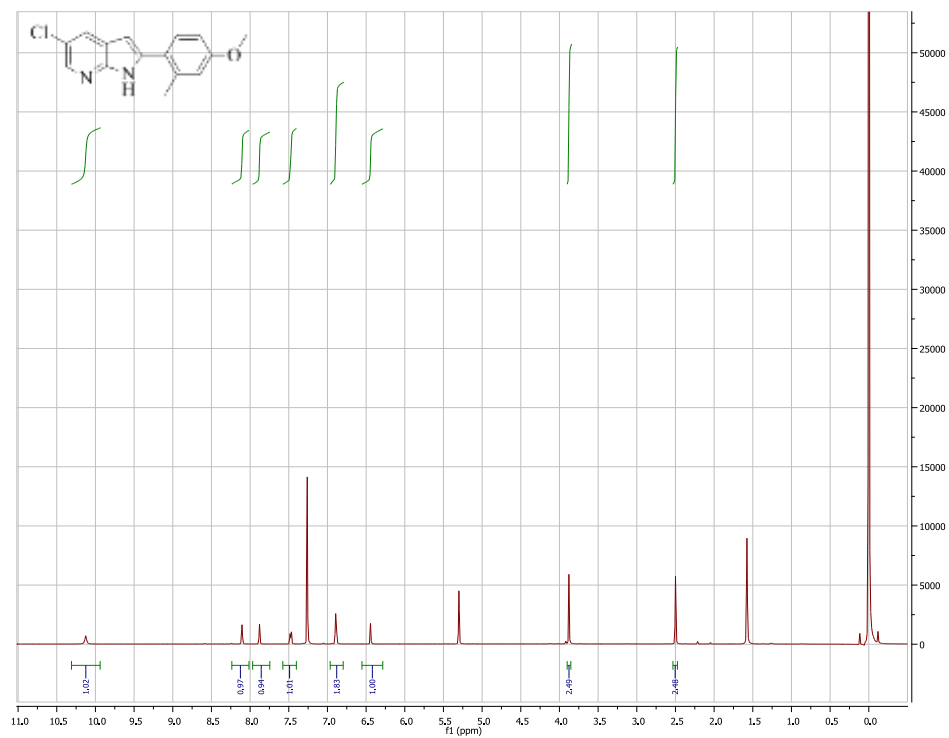

### $^{13}\text{C}$ NMR

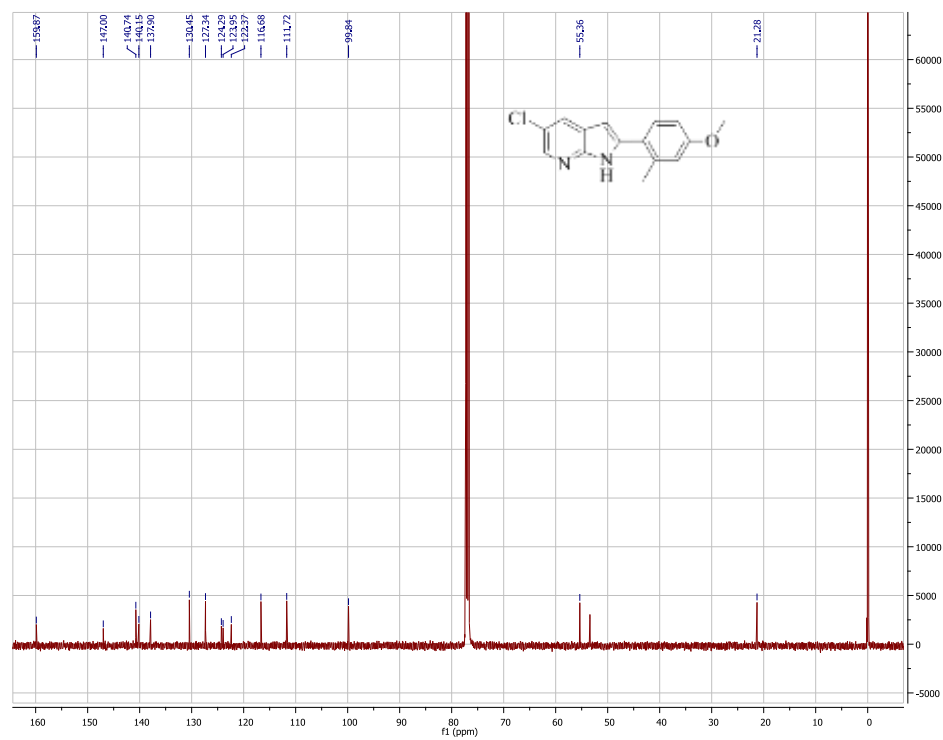

### <sup>1</sup>H NMR

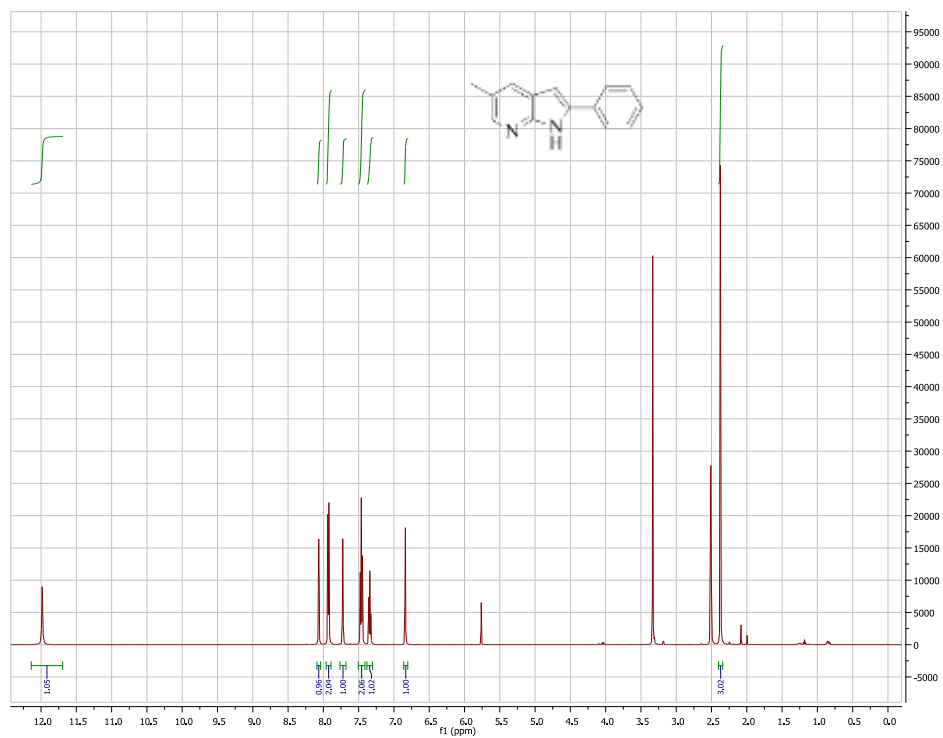

### <sup>13</sup>C NMR

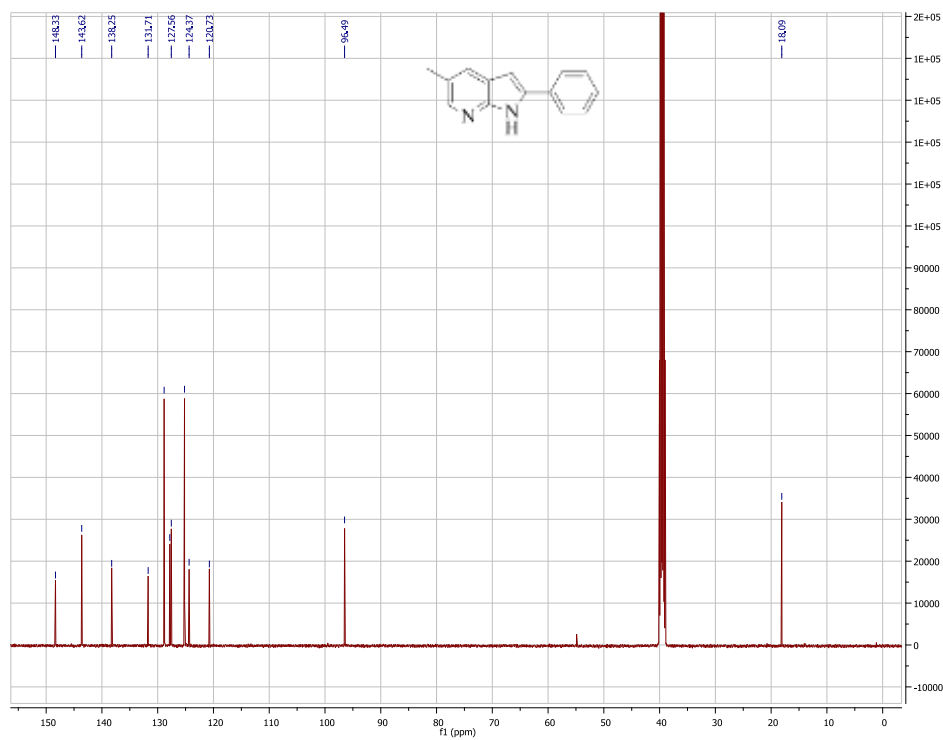

### <sup>1</sup>H NMR

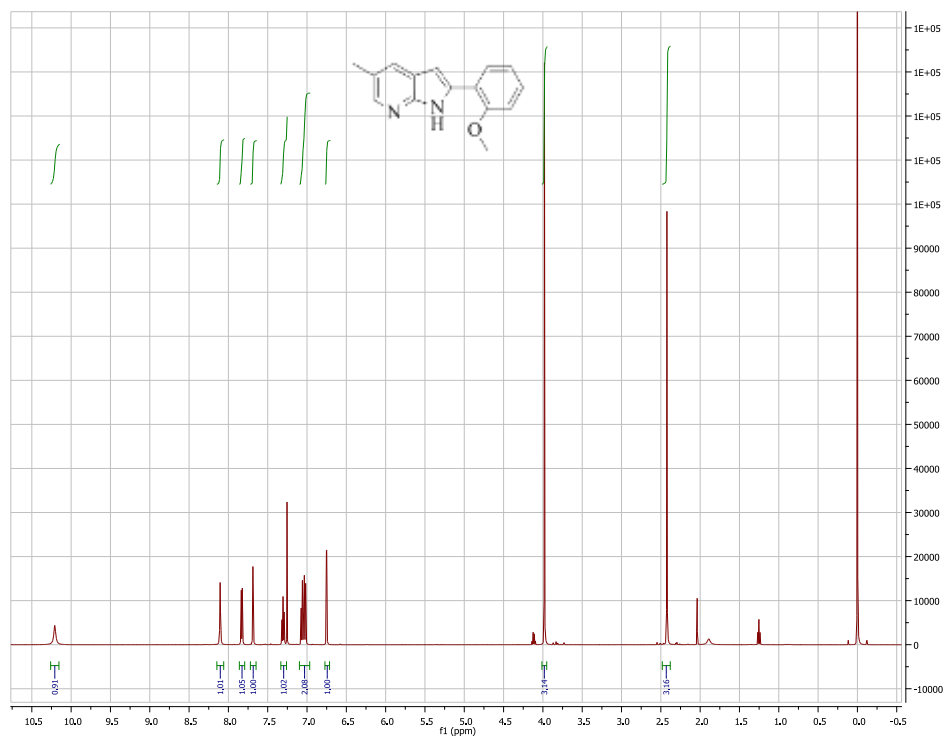

### <sup>13</sup>C NMR

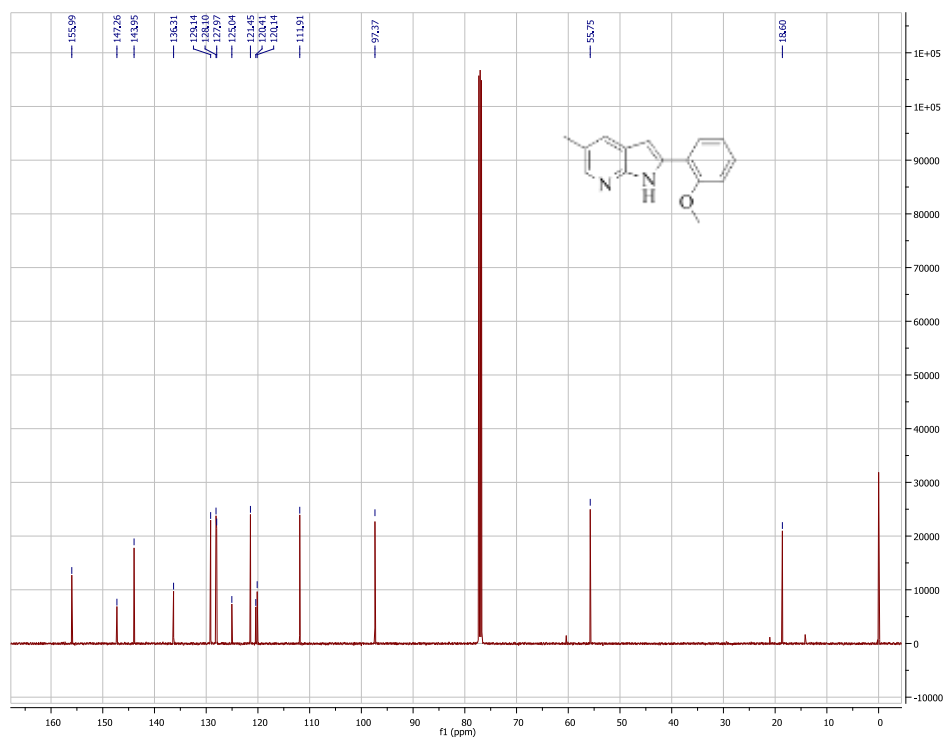

### $^1\text{H}$ NMR

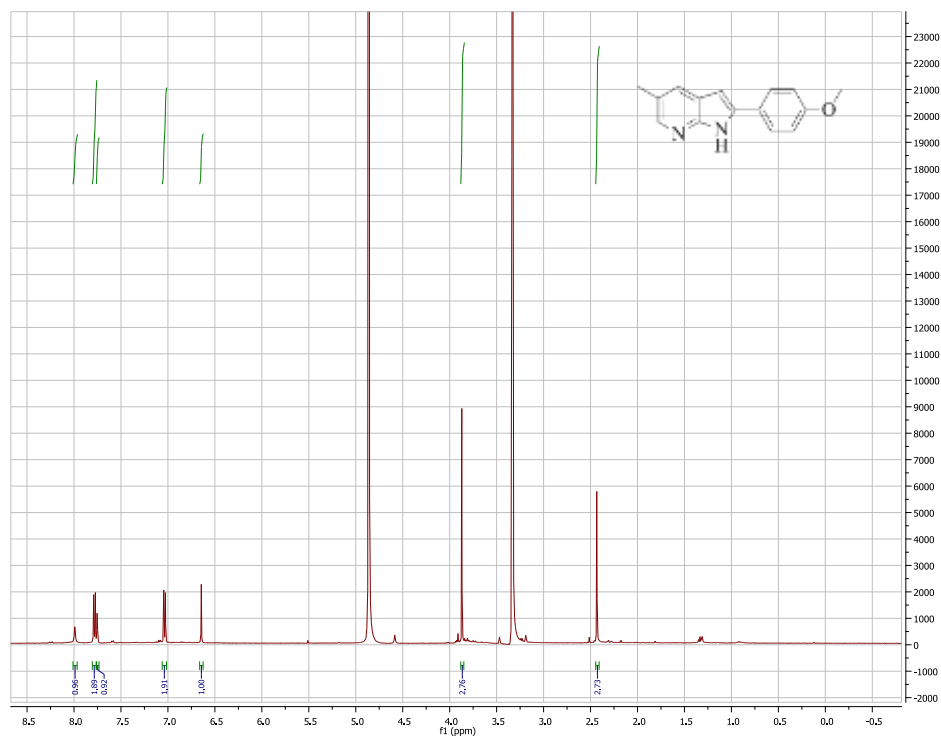

### $^{13}\text{C}$ NMR

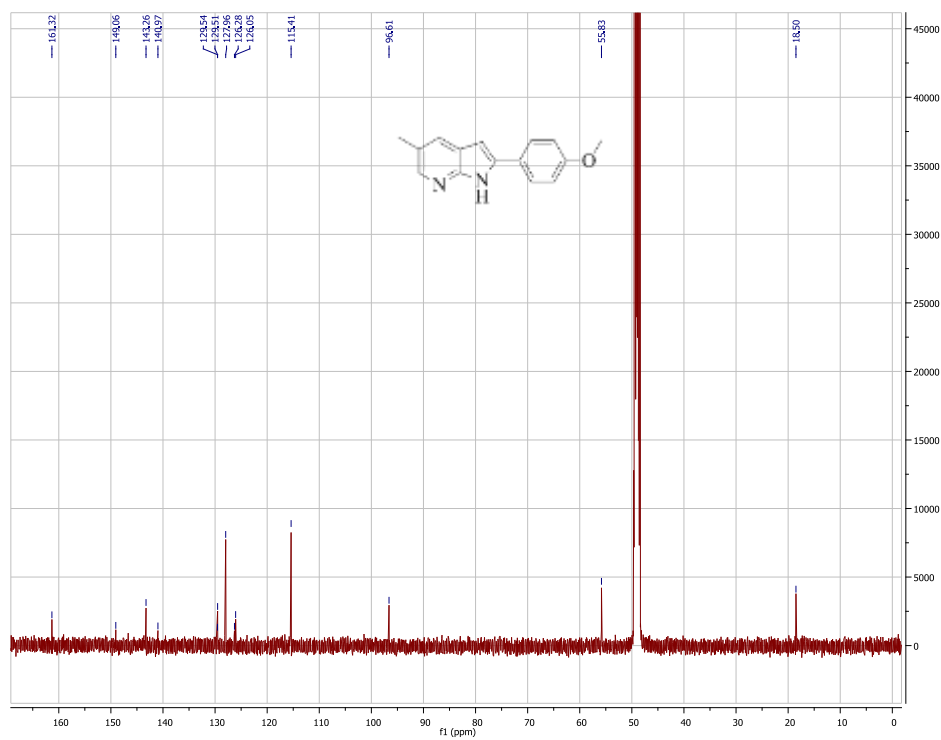



### $^1\text{H}$ NMR

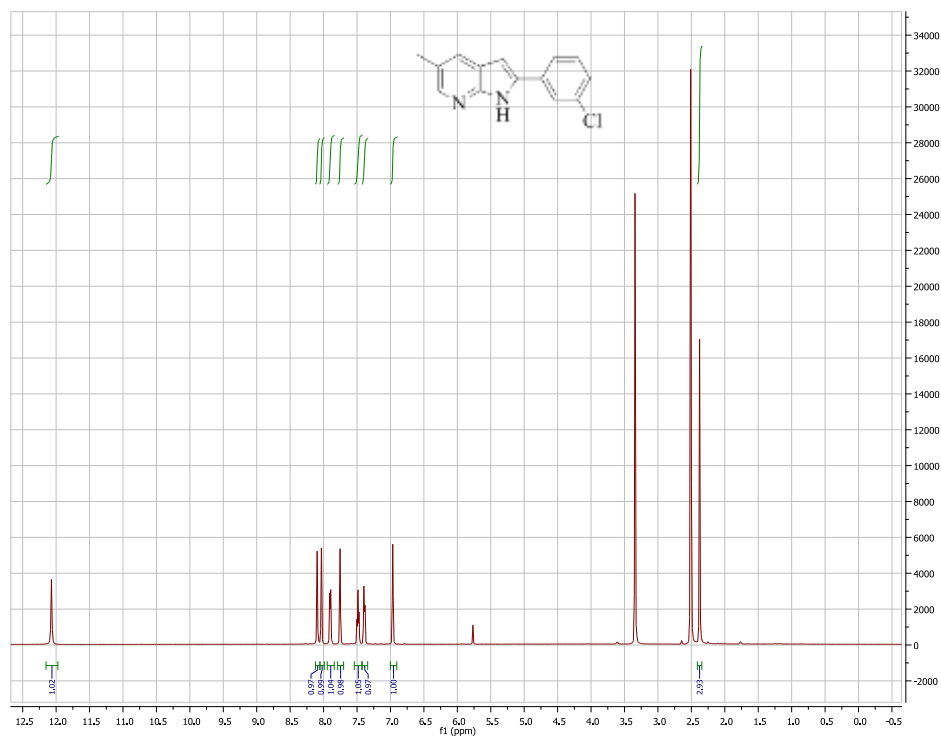

### $^{13}\text{C}$ NMR

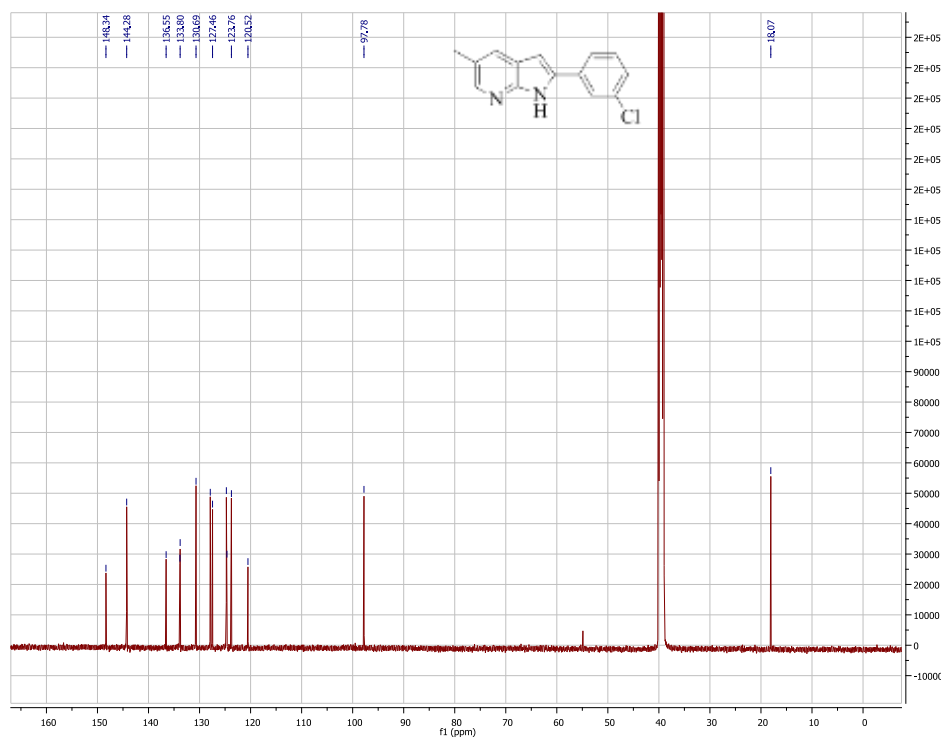

### $^1\text{H}$ NMR

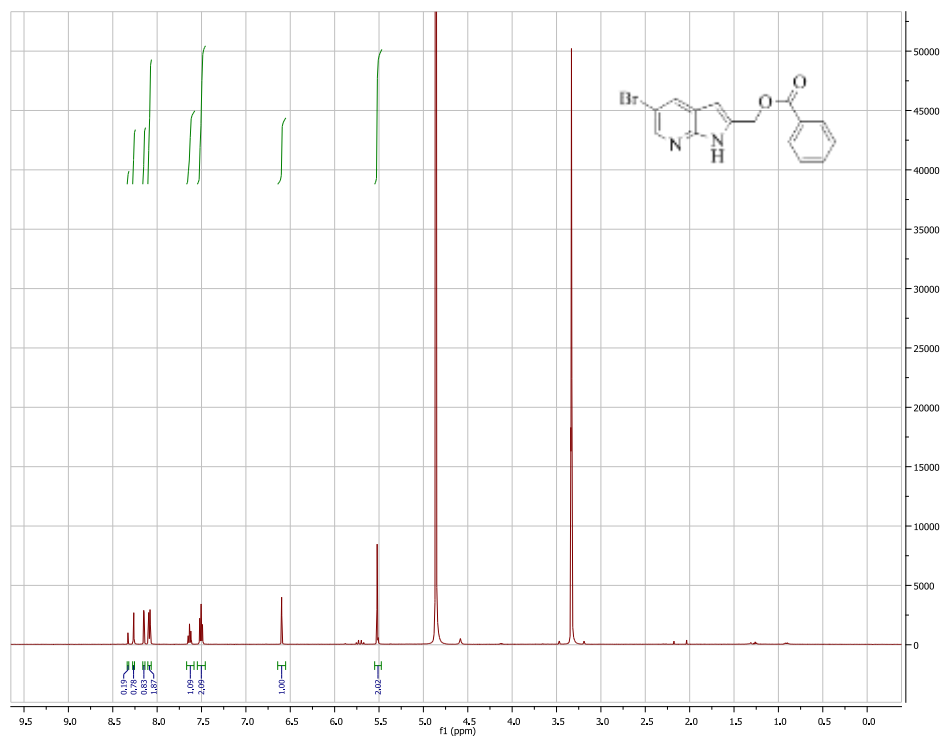

### $^{13}\text{C}$ NMR

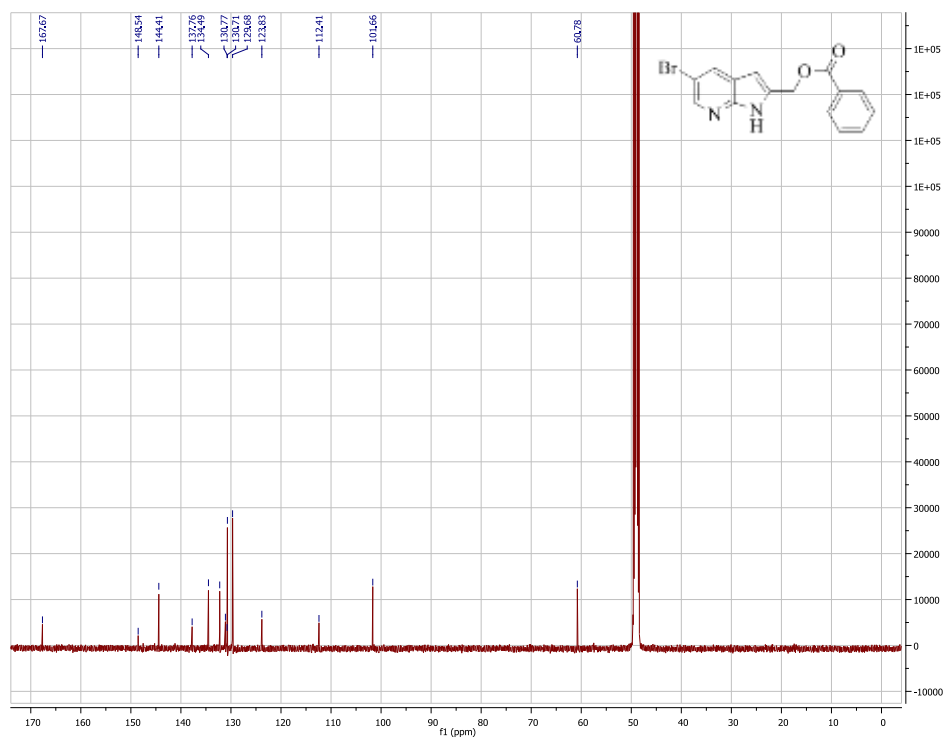

### <sup>1</sup>H NMR

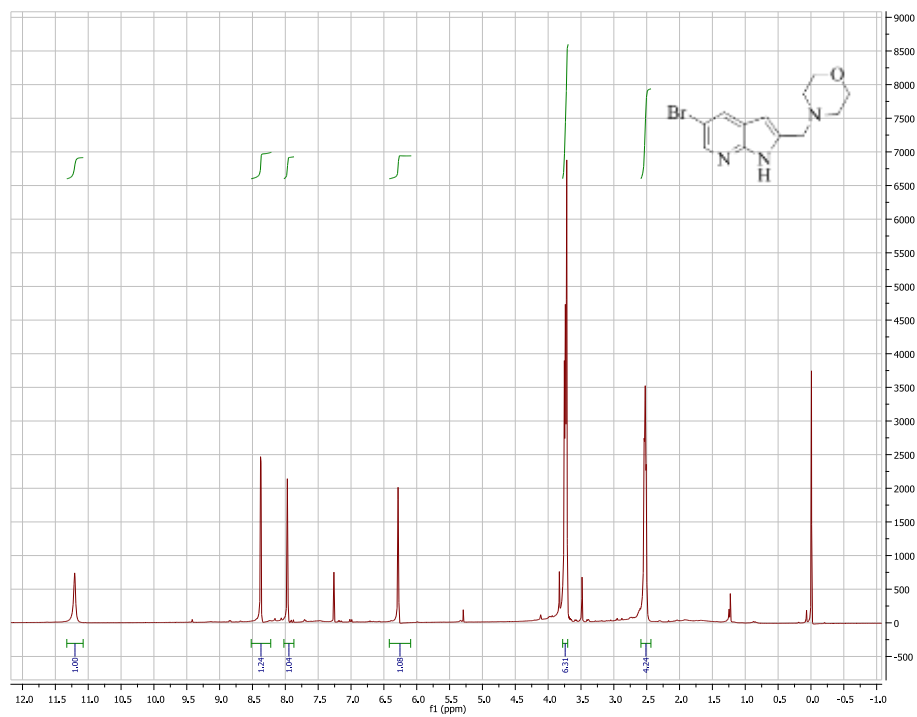

### <sup>13</sup>C NMR

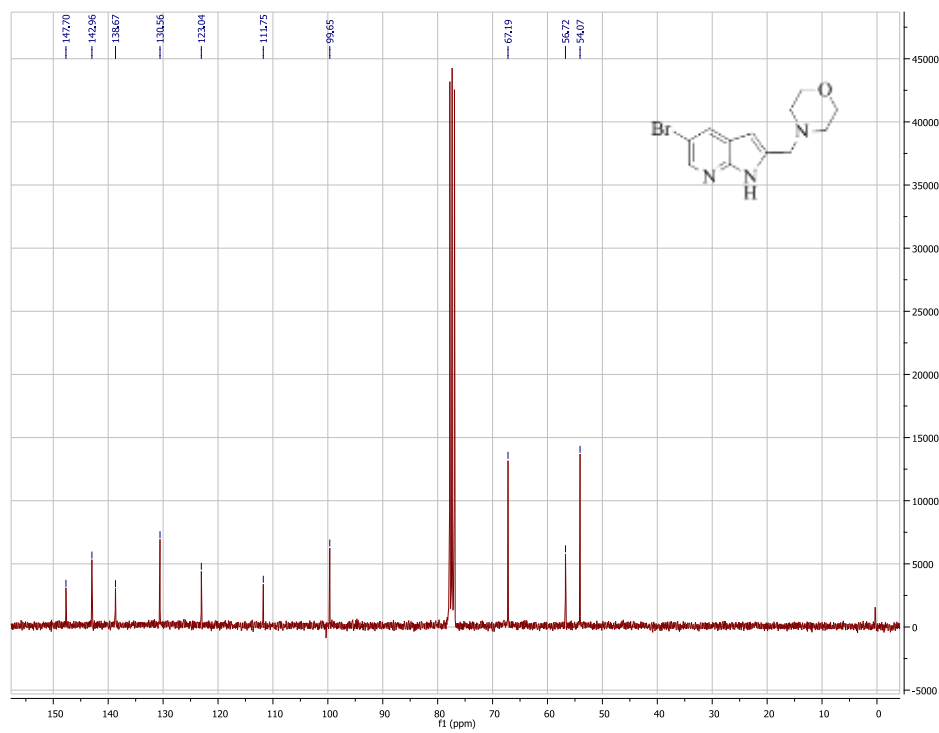

### $^1\text{H}$ NMR

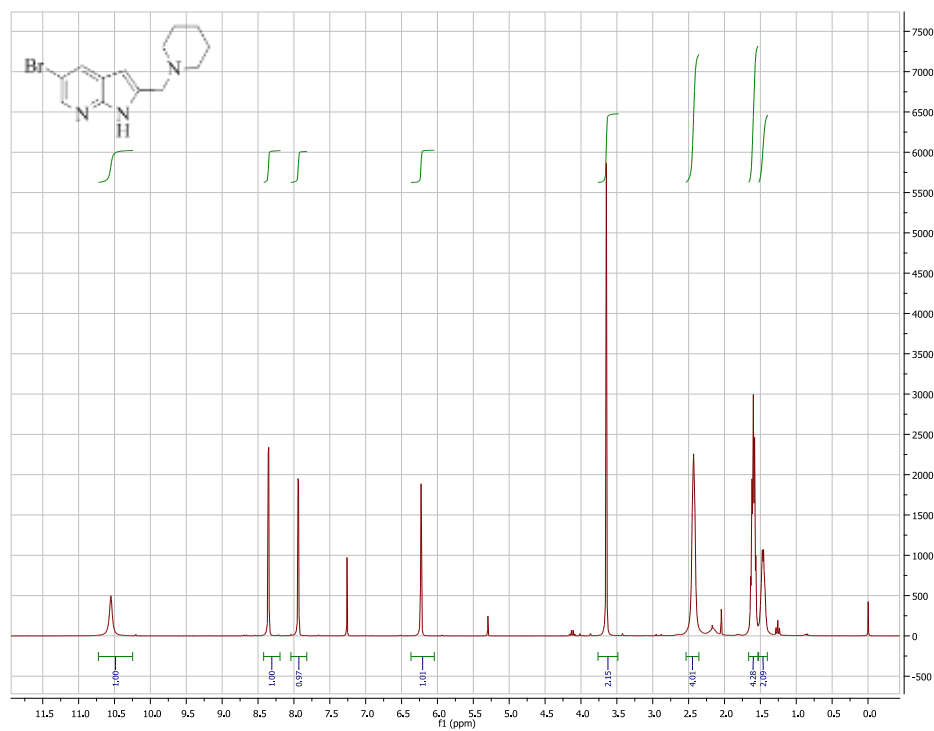

### $^{13}\text{C}$ NMR

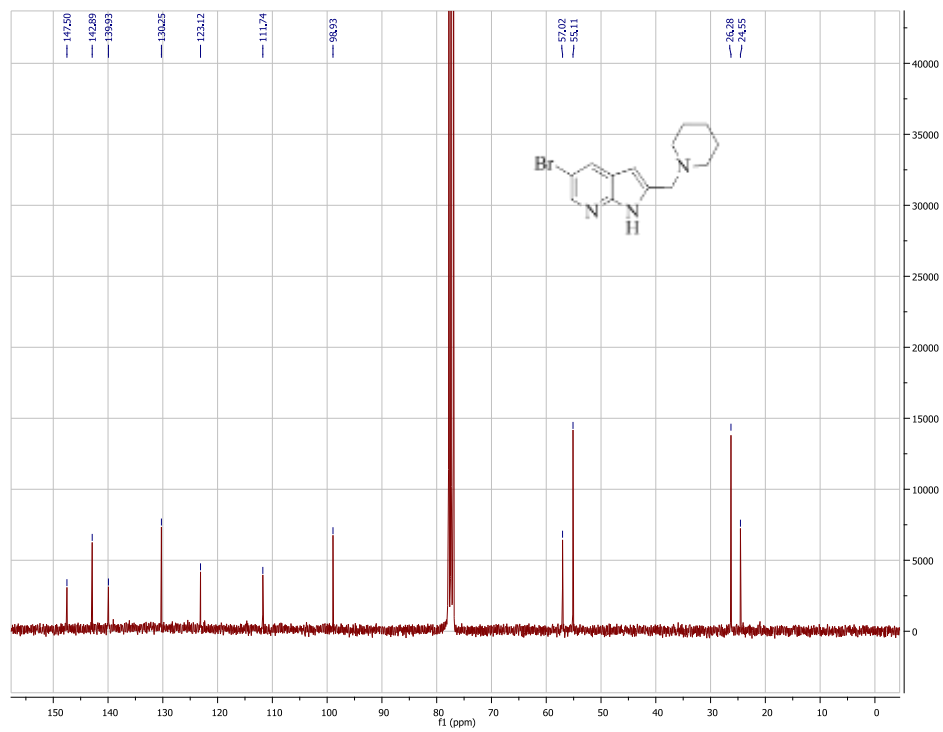

### $^1\text{H}$ NMR

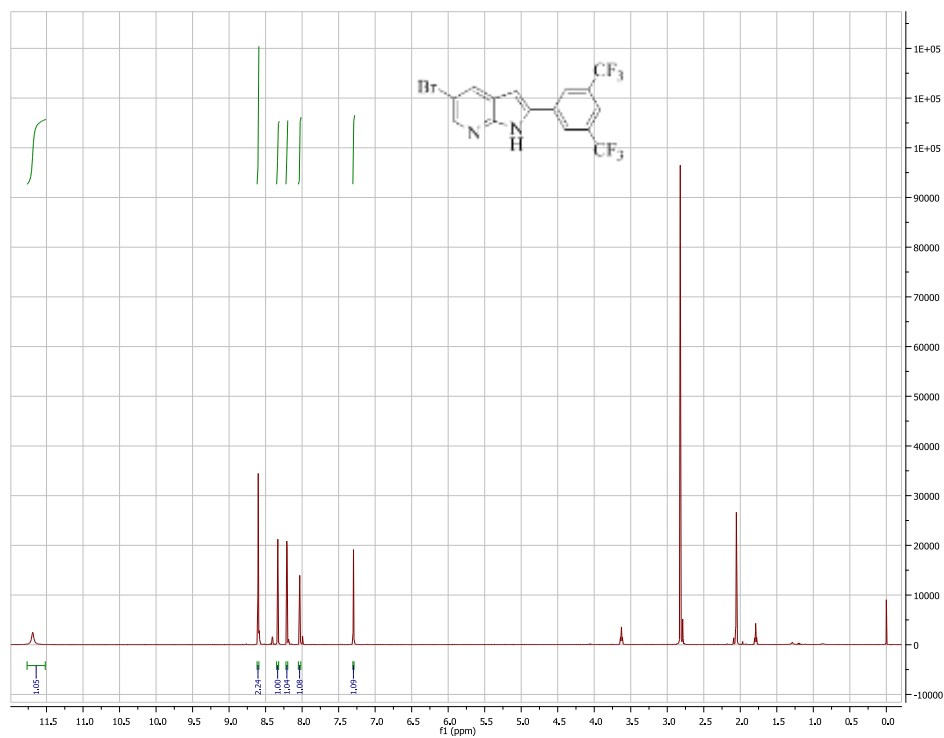

### $^{13}\text{C}$ NMR

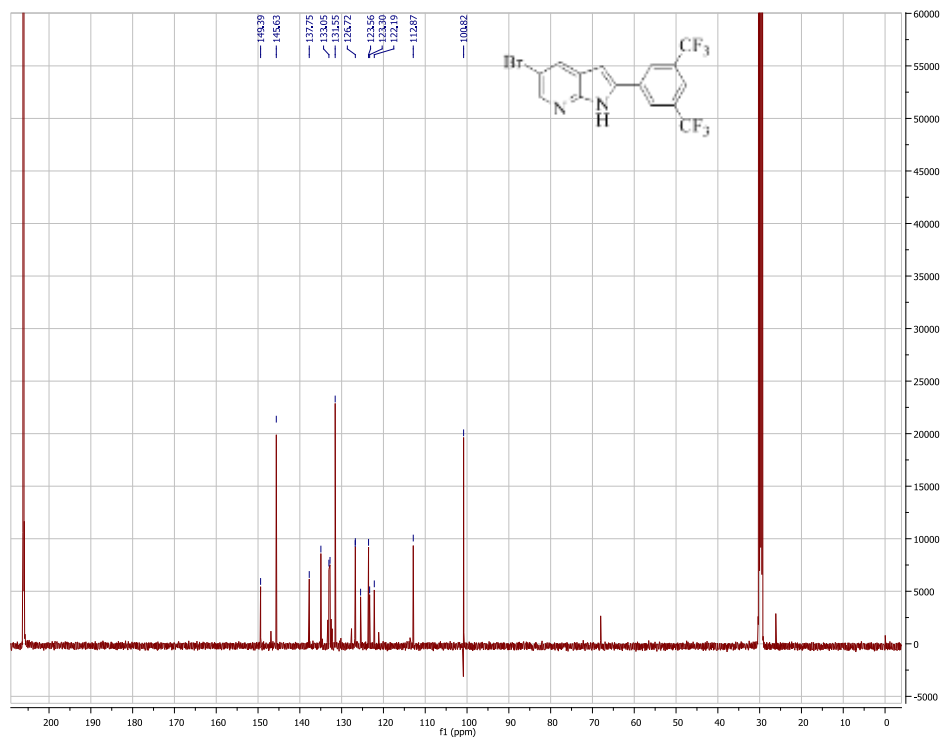

### $^1\text{H}$ NMR

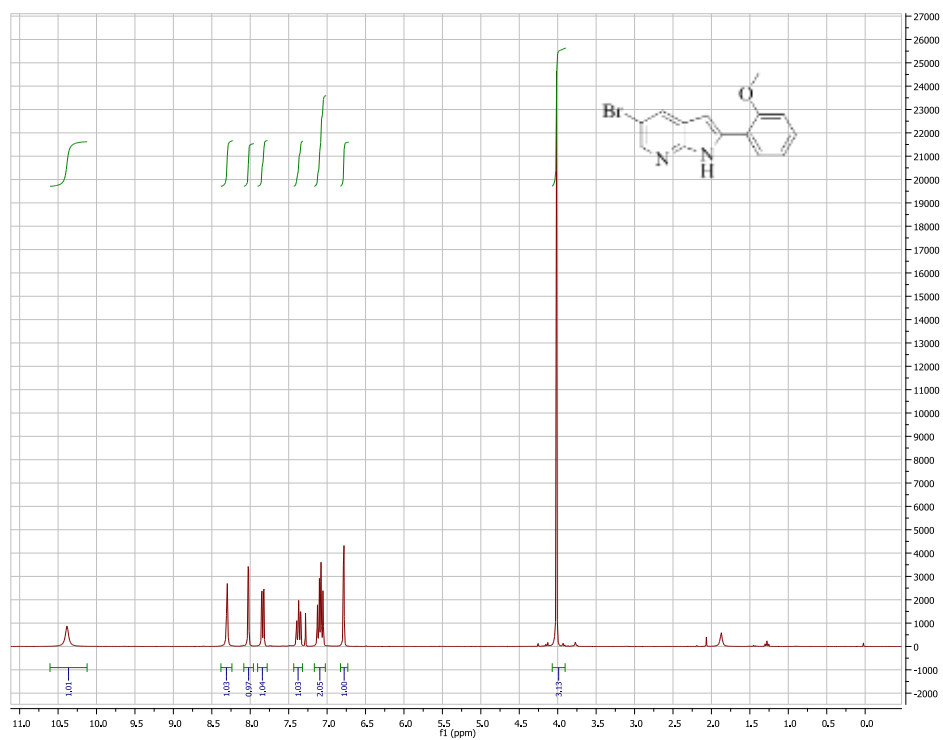

### $^{13}\text{C}$ NMR

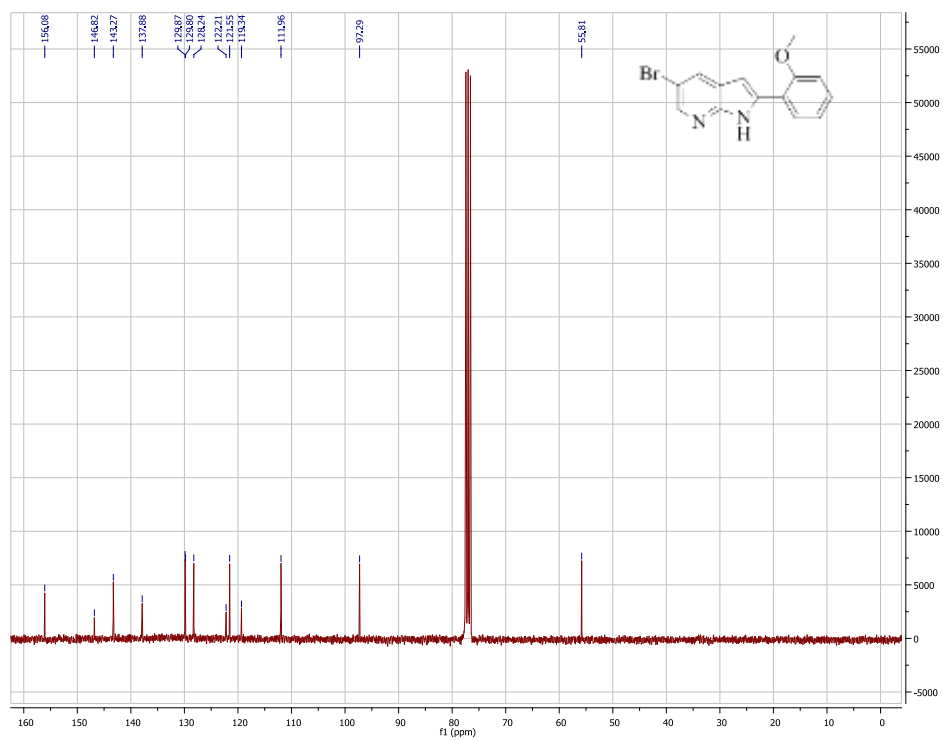

### $^1\text{H}$ NMR

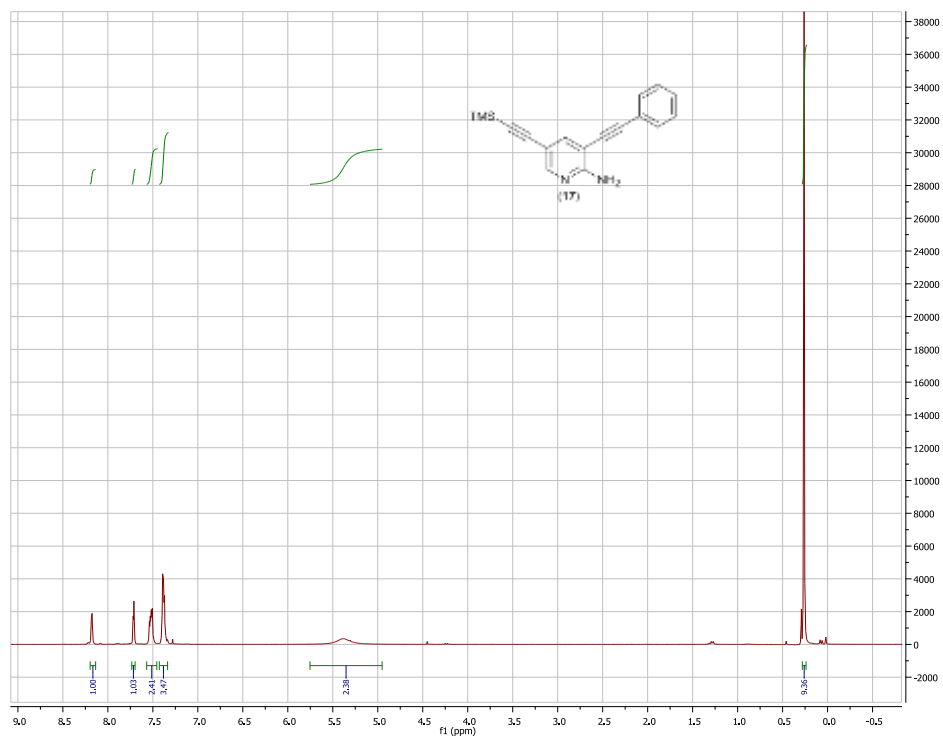

### $^{13}\text{C}$ NMR

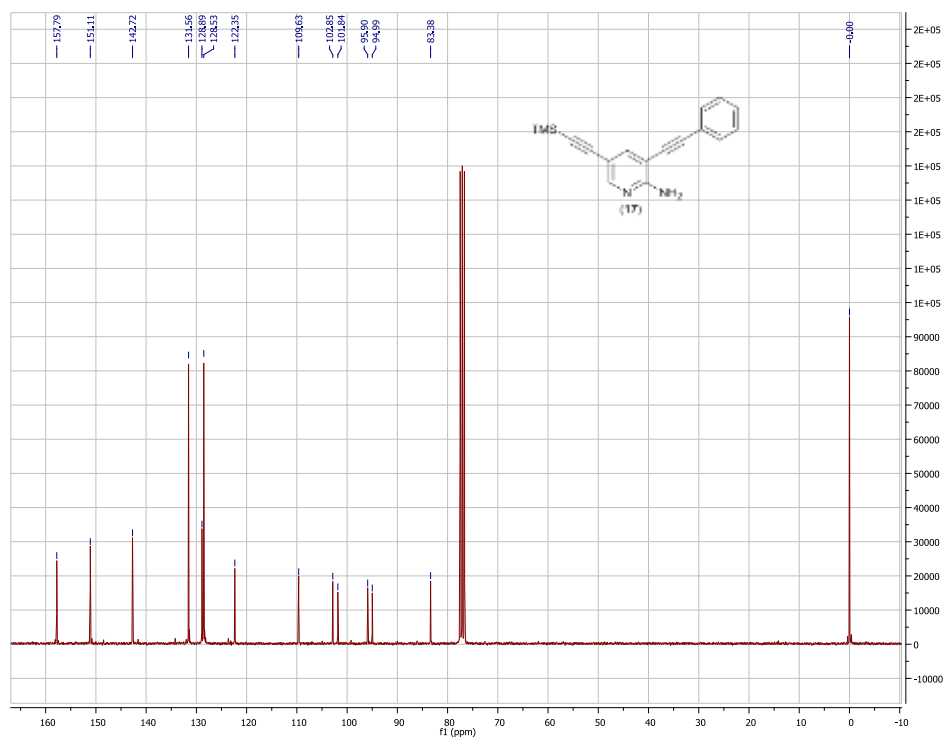

### <sup>1</sup>H NMR

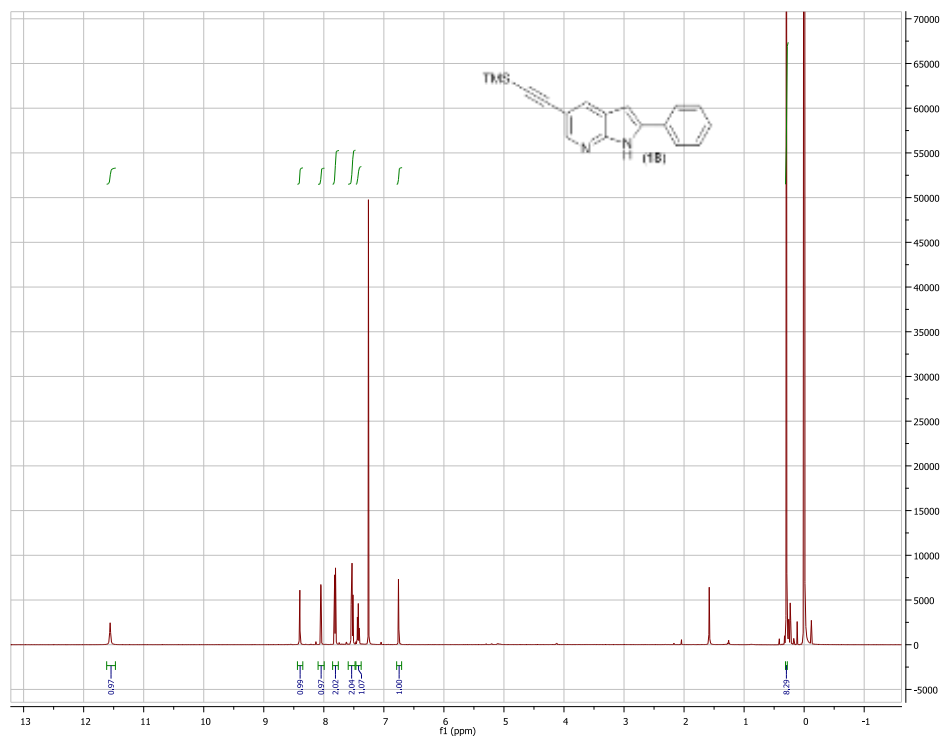

### <sup>13</sup>C NMR

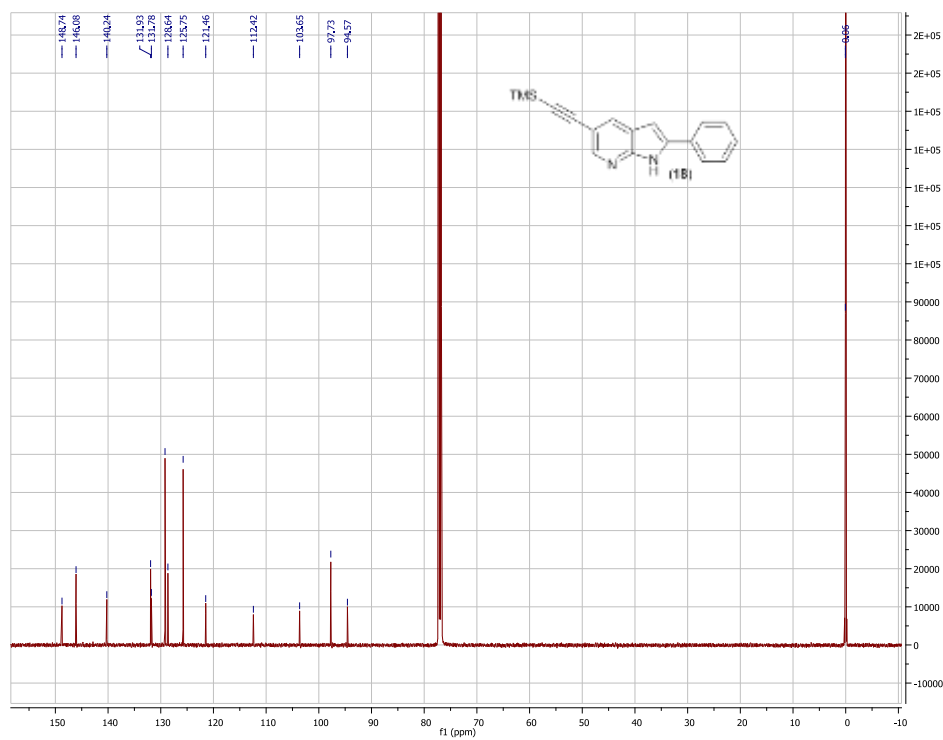

Supplement: c3ob41798k.pdf [file c3ob41798k.pdf]
